# Supplementary material for: First azulene liquid crystal with de Vries behavior and a SmA re-entrant phase
Source: Royal Society of Chemistry journal article supplement (doi:10.1039/d2ma01055k), 2023-01-01
Supplement: d2ma01055k1.pdf [file d2ma01055k1.pdf]

# Supporting Information

## First Azulene Liquid Crystal with de Vries behavior and a SmA Re-entrant Phase

Finn Schulz,<sup>a</sup> Bianca Wank,<sup>a</sup> Pierre Nacke,<sup>b</sup> Wolfgang Frey<sup>a</sup> and Sabine Laschat<sup>\*,a</sup>

<sup>a</sup> *Institut für Organische Chemie, Universität Stuttgart, Pfaffenwaldring 55, D-70569 Stuttgart, Germany*

<sup>b</sup> *Institut für Physikalische Chemie, Universität Stuttgart, Pfaffenwaldring 55, D-70569 Stuttgart, Germany*

Contact:

Sabine Laschat; [sabine.laschat@oc.uni-stuttgart.de](mailto:sabine.laschat@oc.uni-stuttgart.de).

## Table of Contents

|                                             |    |
|---------------------------------------------|----|
| 1. General methods .....                    | 2  |
| 2. Syntheses .....                          | 3  |
| 2.1 General Procedures.....                 | 4  |
| 2.2 Syntheses.....                          | 4  |
| 3. Differential Scanning Calorimetry.....   | 12 |
| 4. Polarizing Optical Microscopy (POM)..... | 13 |
| 5. X-Ray Diffractometry .....               | 15 |
| 6. Single Crystal X-Ray Data.....           | 16 |
| 7. Literature .....                         | 23 |
| 8. NMR-spectra.....                         | 23 |

# 1. General methods

All chemicals were, unless otherwise stated, used without further purification. Anhydrous THF was obtained by refluxing the solvent over potassium. The eluents for chromatography (hexanes, low boiling, and ethyl acetate EtOAc) were distilled prior to use.  $^1\text{H}$  NMR spectra were measured using the Bruker Avance 500, and Bruker Avance 700 spectrometers at 500 MHz, and 700 MHz as well as  $^{13}\text{C}$  NMR spectra at 126 MHz, and 176 MHz, respectively. To assign the signals of the  $^1\text{H}$  and  $^{13}\text{C}$  NMR spectra, COSY, HSQC, and HMBC measurements were carried out. FT-IR spectra were measured on a Bruker Vektor 22 with a MKII Golden Gate Single Reflection Diamond ATR. Absorption bands were rounded to integer wavenumbers /  $\text{cm}^{-1}$  and the absorption intensities were classified as follows: w (weak), m (medium), s (strong). Mass spectra (MS) and high-resolution mass spectra (HRMS) were measured by electrospray ionisation (ESI) or electron impact ionisation (EI) with a Bruker MicrOTOF-Q spectrometer or electron impact ionisation (EI) with a *Varian MAT 711* spectrometer. For thin layer chromatography, silica gel 60 F254 glass plates (layer thickness of 0.25 mm) on aluminium (pore size 60 Å) from Merck were used. Column chromatography was performed using silica gel (particle diameter of 40 – 60  $\mu\text{m}$ ) from Fluka. A polarizing optical microscope Olympus BX 50, equipped with a Linkam LTS heating stage, was used. Temperature regulation was carried out with the control units TP93 and LNP from Linkam ( $\Delta T = \pm 1$  K). Photographs were saved with a digital camera ColorView from Soft Imaging System using the software analySIS. For differential scanning calorimetry, a DSC822e from the company Mettler Toledo was employed. The compounds were analysed in 40  $\mu\text{L}$  sealed aluminium pans. Heating and cooling rates of 5  $\text{K min}^{-1}$  were employed. Phase transition temperatures and enthalpies were determined by onset values using the software STARe 7.01.

Measurements of the X-ray diffraction were performed using a Bruker AXS Nanostar C with a ceramic tube generator (1500 W) having cross-coupled Goebel mirrors providing monochromatic Cu K $\alpha$  radiation (1.5405 Å). Diffraction patterns were recorded with Bruker HI-STAR or VÅNTEC 500 detectors. Calibration was carried out using the diffraction pattern of silver behenate at room temperature. The compounds were examined in sealed glass capillaries from Hilgenberg GmbH (external diameter of 0.7 mm, wall thickness 0.01 mm). Measured values were analysed with the software SAXS from Bruker. The diffraction patterns were further processed using the software Datasqueeze and Origin 2018Pro. For UV/Vis spectroscopy solvents were obtained in spectroscopic grade from the

supplier and were not further purified. For absorption spectra, a Perkin Elmer Lambda 35 spectrometer was employed. Fits were obtained using origin software and the goodness of fit judged by the reduced  $\chi^2$  value and residual plot shape. Optical tilt angles were measured by manually rotating the sample and observing the position of maximum darkness of two opposite tilt domains. Optical birefringence  $\Delta n$  was precisely measured using a Phi-Viz Imaging System from Polaviz (APSYS Inc.) mounted on a Leica DM 2700P polarizing microscope fitted with a HCS 302 hot stage (Instec). Samples were filled in rubbed nylon liquid crystal test cells (AWAT1, Poland) of 3.0  $\mu\text{m}$  thickness in the isotropic phase. The fully automated system uses three liquid crystal variable retarders replacing the polarizer and analyzer of the microscope. Polychromatic light with an average wavelength of 550 nm was used and the intensity of the light detected with a digital camera for a maximum of 1900 x 1200 pixels. By cycling through different polarization states, a 2D map of the optic axis and the retardance of the sample were obtained.

## 2. Syntheses

The synthesis of phenylboronic acids is well known in the literature and described elsewhere.

The synthesis of 6-alkoxy-2-bromoazulenes is described in our previous paper.<sup>1</sup>

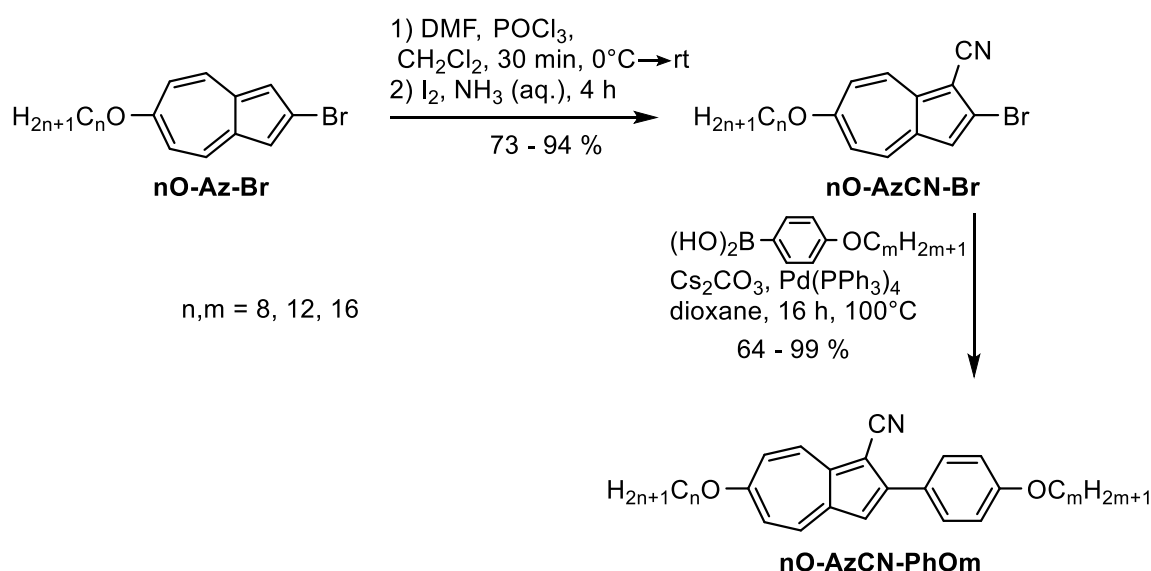

## 2.1 General Procedures

### General procedure for the nitrilation of 6-alkoxy-2-bromoazulenes-bromoazulenes nO-Az-Br via Vilsmeier-Haack reaction at the example of 12O-Az-Br (GP 1)

Adapting a procedure of Ushijima,<sup>2</sup> POCl<sub>3</sub> (9.5  $\mu$ L, 16 mg, 102  $\mu$ mol) was slowly added to dry DMF (1 mL) at 0 °C. The solution was then stirred for 30 min. **12O-Az-Br** (40 mg, 102  $\mu$ mol) in dry CH<sub>2</sub>Cl<sub>2</sub> (10 mL) was cooled down to 0 °C and then added slowly to the reaction mixture. After warming up to room temperature overnight, aq. ammonia (30 Vol%, 5 mL) was added dropwise. During the addition, a color change from orange to green to red was observed within seconds. Subsequently, iodine (52 mg, 204  $\mu$ mol) was added, and the reaction was stirred vigorously for 4 h, and subsequently quenched with water (10 mL). After phase separation, the organic phase was washed with sat. NaHSO<sub>3</sub> solution and water (each 2x; 10 mL) and dried over MgSO<sub>4</sub>. The solution was filtered over a silica pad. Careful elution of the orange spot with CH<sub>2</sub>Cl<sub>2</sub>, without simultaneously eluting the more polar yellow spot afforded the pure **12O-AzCN-Br** as an orange solid in 94 % yield (40 mg, 96  $\mu$ mol).

### General Procedure for Suzuki-coupling of nO-AzCN-Br with aryl boronic acids at the example of 12O-AzCN-Br (GP2).

**C12O-AzCN-Br** (38 mg, 91  $\mu$ mol), (4-dodecyloxyphenyl) boronic acid (42 mg, 137  $\mu$ mol) and Cs<sub>2</sub>CO<sub>3</sub> (89 mg, 274 mmol) were dissolved in dioxane (5 mL). The mixture was degassed for 30 min, then Pd(PPh<sub>3</sub>)<sub>4</sub> (5 mg, 5  $\mu$ mol) was added and the reaction was refluxed for 16 h. After cooling down, Celite was added and the solvent was removed under reduced pressured. Purification was performed by column chromatography on silica with an adequate solvent (hexanes / CH<sub>2</sub>Cl<sub>2</sub> 1 : 1) and subsequent recrystallization from isopropanol. Azulene **12O-AzCN-PhO12** was obtained as an orange solid in 64 % yield (35 mg, 59  $\mu$ mol).

## 2.2 Syntheses

### 2-Bromo-6-octyloxyazulene-1-carbonitrile (8O-AzCN-Br)

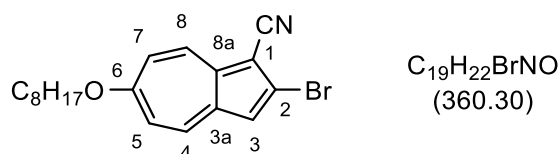

Synthesis according to GP1: **8O-Az-Br** (70 mg, 209  $\mu$ mol), POCl<sub>3</sub> (20  $\mu$ L, 209  $\mu$ mol), DMF (3 mL), CH<sub>2</sub>Cl<sub>2</sub> (10 mL), I<sub>2</sub> (106 mg, 418  $\mu$ mol), NH<sub>3</sub> (30 vol%, 10 mL); yield: orange solid (70 mg, 194  $\mu$ mmol, 93 %); melting point (POM): 88 °C; <sup>1</sup>H NMR (500 MHz, CDCl<sub>3</sub>):

$\delta = 0.89$  (t,  $J = 6.8$  Hz, 3H, CH<sub>3</sub>), 1.24–1.42 (m, 8H, CH<sub>2</sub>), 1.46–1.54 (m, 2H, OCH<sub>2</sub>CH<sub>2</sub>CH<sub>2</sub>), 1.83–1.93 (m, 2H, OCH<sub>2</sub>CH<sub>2</sub>), 4.16 (t,  $J = 6.5$  Hz, 2H, OCH<sub>2</sub>), 7.09–7.11 (m, 1H, 5-H), 7.11–7.13 (m, 1H, 7-H), 7.16 (s, 1H, 3-H), 8.18 (d,  $J = 11.2$  Hz, 1H, 4-H), 8.36 (d,  $J = 11.1$  Hz, 1H, 8-H) ppm; <sup>13</sup>C NMR (126 MHz, CDCl<sub>3</sub>):  $\delta = 14.1$  (CH<sub>3</sub>), 22.7, 26.0, 29.0, 29.2, 29.3, 31.8 (CH<sub>2</sub>), 69.7 (OCH<sub>2</sub>), 99.4 (C-1), 115.4 (C-7), 116.3 (C-2), 116.9 (C-5), 119.9 (C-3), 124.3 (CN), 135.1 (C-8), 137.1 (C-3a, C-4), 138.5 (C-8a), 169.1 (C-6) ppm; FT-IR (ATR):  $\tilde{\nu} = 3099$  (w), 2948 (w), 2923 (m), 2852 (w), 2204 (m), 1581 (m), 1544 (w), 1499 (w), 1440 (w), 1406 (m), 1389 (s), 1294 (w), 1272 (m), 1200 (s), 1127 (w), 1020 (w), 979 (w), 901 (w), 855 (m), 825 (w), 792 (w), 766 (w), 730 (w), 713 (w), 644 (w), 622 (w), 504 (w) cm<sup>-1</sup>; MS (ESI):  $m/z$  for C<sub>19</sub>H<sub>23</sub>BrNO<sup>+</sup> calc.: 360.10 [M+H]<sup>+</sup>, found.: 360.09; HRMS (ESI):  $m/z$  for C<sub>19</sub>H<sub>23</sub>BrNO<sup>+</sup> calc.: 360.0958 [M+H]<sup>+</sup>, found: 360.0943.

## 2-Bromo-6-dodecyloxyazulene-1-carbonitrile (**12O-AzCN-Br**)

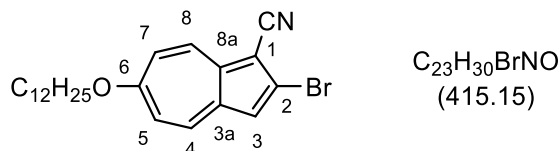

Synthesis according to GP1; **12O-Az-Br** (40 mg, 102  $\mu\text{mol}$ ), POCl<sub>3</sub> (10  $\mu\text{L}$ , 102  $\mu\text{mol}$ ), DMF (1 mL), CH<sub>2</sub>Cl<sub>2</sub> (10 mL), I<sub>2</sub> (52 mg, 204  $\mu\text{mol}$ ), NH<sub>3</sub> (30 vol%, 5 mL); yield: orange solid (40 mg, 96  $\mu\text{mol}$ , 94 %); melting point (POM): 91 °C; <sup>1</sup>H NMR (500 MHz, CDCl<sub>3</sub>):  $\delta = 0.88$  (t,  $J = 6.9$  Hz, 3H, CH<sub>3</sub>), 1.20–1.41 (m, 16H, CH<sub>2</sub>), 1.46–1.54 (m, 2H, OCH<sub>2</sub>CH<sub>2</sub>CH<sub>2</sub>), 1.84–1.92 (m, 2H, OCH<sub>2</sub>CH<sub>2</sub>), 4.15 (t,  $J = 6.5$  Hz, 2H, OCH<sub>2</sub>), 7.08–7.13 (m, 2H, 5-H, 7-H), 7.15 (s, 1H, 3-H), 8.17 (d,  $J = 11.3$  Hz, 1H, 4-H), 8.35 (d,  $J = 11.1$  Hz, 1H, 8-H) ppm; <sup>13</sup>C NMR (126 MHz, CDCl<sub>3</sub>):  $\delta = 14.2$  (CH<sub>3</sub>), 22.7, 26.0, 29.0, 29.3, 29.4, 29.6, 29.6, 29.7, 29.7, 31.9 (CH<sub>2</sub>), 69.7 (OCH<sub>2</sub>), 99.4 (C-1), 115.5 (C-5/C-7), 116.3 (C-2), 116.8 (C-5/C-7), 119.8 (C-3), 124.2 (CN), 135.1 (C-8), 137.0, 137.1 (C-4, C-3a), 138.5 (C-8a), 169.1 (C-6) ppm; FT-IR (ATR):  $\tilde{\nu} = 2918$  (m), 2849 (m), 2203 (m), 1582 (s), 1546 (w), 1495 (w), 1468 (w), 1435 (w), 1419 (w), 1389 (s), 1288 (w), 1251 (s), 1195 (s), 1127 (w), 1016 (m), 988 (m), 972 (m), 899 (m), 840 (m), 828 (m), 803 (w), 778 (w), 760 (m), 721 (w), 710 (m), 619 (w), 541 (w), 506 (w) cm<sup>-1</sup>; MS(ESI):  $m/z$  für C<sub>23</sub>H<sub>31</sub>BrNO<sup>+</sup> calc.: 416.16 [M+H]<sup>+</sup>, found: 416.16; HRMS(ESI):  $m/z$  für C<sub>23</sub>H<sub>31</sub>BrNO<sup>+</sup> calc.: 416.1584 [M+H]<sup>+</sup>, found.: 416.1585.

## 2-Bromo-6-hexadecyloxyazulene-1-carbonitrile (**16O-AzCN-Br**)

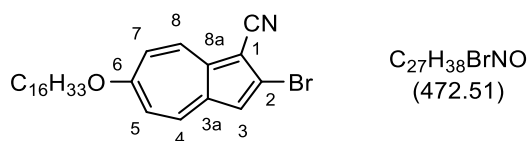

Synthesis according to GP1; **16O-Az-Br** (89 mg, 188  $\mu$ mol),  $POCl_3$  (18  $\mu$ L, 188  $\mu$ mol), DMF (1 mL),  $CH_2Cl_2$  (10 mL),  $I_2$  (95 mg, 376  $\mu$ mol),  $NH_3$  (30 vol%, 10 mL); yield: orange solid (65 mg, 188  $\mu$ mol, 73 %); melting point (POM): 93  $^{\circ}C$ ;  $^1H$  NMR (700 MHz,  $CDCl_3$ ):  $\delta$  = 0.88 (t,  $J$  = 7.1 Hz, 3H,  $CH_3$ ), 1.21–1.41 (m, 24H,  $CH_2$ ), 1.47–1.53 (m, 2H,  $OCH_2CH_2CH_2$ ), 1.86–1.91 (m, 2H,  $OCH_2CH_2$ ), 4.15 (t,  $J$  = 6.5 Hz, 2H,  $OCH_2$ ), 7.08–7.12 (m, 2H, 5-H, 7-H), 7.15 (s, 1H, 3-H), 8.17 (d,  $J$  = 11.1 Hz, 1H, 4-H), 8.35 (d,  $J$  = 11.0 Hz, 1H, 8-H) ppm;  $^{13}C$  NMR (176 MHz,  $CDCl_3$ ):  $\delta$  = 14.1 ( $CH_3$ ), 22.7, 25.9, 25.9, 28.9, 29.0, 29.3, 29.4, 29.5, 29.6, 29.7, 29.7, 29.7, 29.7, 29.7, 31.9 ( $CH_2$ ), 69.7 ( $OCH_2$ ), 99.4 (C-1), 115.5 (C-7), 116.3 (C-2), 116.8 (C-5), 119.8 (C-3), 124.2 (CN), 135.1 (C-8), 137.0 (C-3a), 137.1 (C-4), 138.5 (C-8a), 169.1 (C-6) ppm; FT-IR (ATR):  $\tilde{\nu}$  = 2917 (s), 2848 (s), 2204 (m), 1583 (m), 1546 (w), 1495 (w), 1468 (m), 1436 (m), 1419 (w), 1389 (m), 1287 (w), 1251 (m), 1197 (s), 1038 (w), 1012 (m), 988 (m), 899 (m), 842 (s), 826 (m), 778 (m), 759 (m), 721 (m), 711 (m), 619 (w), 541 (w), 506 (m)  $cm^{-1}$ ; MS (ESI):  $m/z$  for  $C_{33}H_{43}NO_2^+$  calc.: 472.22  $[M+H]^+$ , found.: 472.22; HRMS (ESI):  $m/z$  for  $C_{27}H_{39}BrNO^+$  calc.: 472.2210  $[M+H]^+$ , found.: 472.2212.

### 6-Octyloxy-2-(4-octyloxyphenyl)azulene-1-carbonitrile (**8O-AzCN-PhO8**)

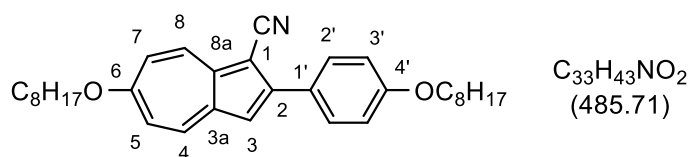

Synthesis according to GP2; **8O-AzCN-Br** (100 mg, 278  $\mu\text{mol}$ ), 4-octyloxyphenylboronic acid (208 mg, 833  $\mu\text{mol}$ );  $\text{Pd}(\text{PPh}_3)_4$  (32 mg, 28  $\mu\text{mol}$ ),  $\text{Cs}_2\text{CO}_3$  (271 mg, 833  $\mu\text{mol}$ ), dioxane (5 mL); yield: orange solid (114 mg, 235  $\mu\text{mol}$ , 85 %); melting behavior: Cr 101  $^\circ\text{C}$  SmA 155  $^\circ\text{C}$  I;  $^1\text{H}$  NMR (500 MHz,  $\text{CDCl}_3$ ):  $\delta$  = 0.87–0.92 (m, 6H,  $\text{CH}_3$ ), 1.24–1.42 (m, 16H,  $\text{CH}_2$ ), 1.44–1.54 (m, 4H,  $\text{OCH}_2\text{CH}_2\text{CH}_2$ ), 1.78–1.91 (m, 4H,  $\text{OCH}_2\text{CH}_2$ ), 4.03 (t,  $J$  = 6.6 Hz, 2H, 4'- $\text{OCH}_2$ ), 4.14 (t,  $J$  = 6.5 Hz, 2H, 6- $\text{OCH}_2$ ), 7.00–7.04 (m, 2H, 3'-H), 7.04–7.08 (m, 2H, 5-H, 7-H), 7.34 (s, 1H, 3-H), 7.95–8.00 (m, 2H, 2'-H), 8.18 (d,  $J$  = 11.5 Hz, 1H, 4-H), 8.42 (d,  $J$  = 10.7 Hz, 1H, 8-H) ppm;  $^{13}\text{C}$  NMR (126 MHz,  $\text{CDCl}_3$ ):  $\delta$  = 14.1 ( $\text{CH}_3$ ), 22.7, 22.7, 26.0, 26.1, 29.1, 29.2, 29.3, 29.3, 29.4, 31.8, 31.9 ( $\text{CH}_2$ ), 68.2 (4'- $\text{OCH}_2$ ), 69.4 (6- $\text{OCH}_2$ ), 93.7 (C-1), 114.0 (C-7), 115.0 (C-3'), 116.4 (C-3), 116.9 (C-5), 118.9 (CN), 127.2 (C-1'), 129.5 (C-2'), 134.6 (C-8), 136.7 (C-4), 138.0 (C-3a), 141.0 (C-8a), 148.0 (C-2), 159.8 (C-4'), 167.9 (C-6) ppm; FT-IR (ATR):  $\tilde{\nu}$  = 3085 (w), 3044 (w), 2952 (m), 2918 (s), 2869 (m), 2851 (s), 2730 (w), 2387 (w), 2202 (m), 1605 (m), 1581 (s), 1544 (m), 1526 (m), 1462 (s), 1430 (s), 1408 (m), 1388 (m), 1378 (m), 1318 (w), 1301 (w), 1288 (m), 1269 (m), 1253 (s), 1210 (m), 1196 (s), 1185 (s), 1142 (w), 1129 (w), 1084 (w), 1069 (w), 1031 (m), 1018 (m), 1000 (m), 982 (m), 962 (w), 934 (w), 905 (m), 872 (w), 845 (m), 830 (s), 797 (m), 772 (w), 734 (m), 722 (m), 636 (w), 622 (w), 536 (w), 507 (m)  $\text{cm}^{-1}$ ; MS (ESI):  $m/z$  for  $\text{C}_{33}\text{H}_{43}\text{NO}_2^+$  calc.: 486.3  $[\text{M}+\text{H}]^+$ , found.: 486.3; HRMS (ESI):  $m/z$  for  $\text{C}_{33}\text{H}_{44}\text{NO}_2^+$  calc.: 486.3367  $[\text{M}+\text{H}]^+$ , found.: 486.3355.

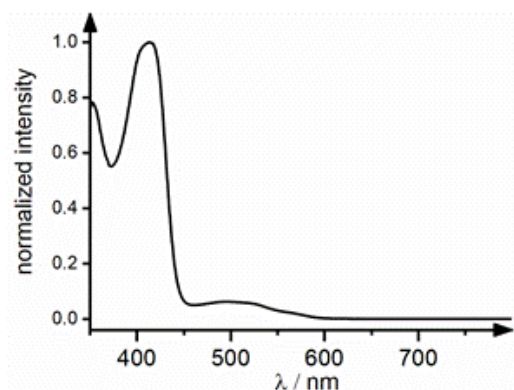

Figure S1: Normalized UV/VIS spectra of **8O-AzCN-PhO8** in chloroform.

## 6-Dodecyloxy-2-(4-dedecyloxyphenyl)azulene-1-carbonitrile (**12O-AzCN-PhO12**)

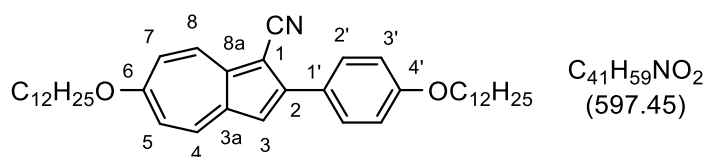

Synthesis according to GP2; **12O-AzCN-Br** (38 mg, 91  $\mu$ mol), 4-dodecyloxyphenyl boronic acid (42 mg, 137  $\mu$ mol);  $Pd(PPh_3)_4$  (5 mg, 5  $\mu$ mol),  $Cs_2CO_3$  (89 mg, 274  $\mu$ mol), dioxane (5 mL); yield: orange solid (35 mg, 59  $\mu$ mol, 64 %); melting behavior: Cr 90 °C SmC 133 °C SmA 150 °C I;  $^1H$  NMR (500 MHz,  $CDCl_3$ ):  $\delta$  = 0.88 (t,  $J$  = 6.8 Hz, 6H,  $CH_3$ ), 1.21–1.42 (m, 32H,  $CH_2$ ), 1.43–1.55 (m, 4H,  $OCH_2CH_2CH_2$ ), 1.76–1.94 (m, 4H,  $OCH_2CH_2$ ), 4.02 (t,  $J$  = 6.6 Hz, 2H, C-4'- $OCH_2$ ), 4.13 (t,  $J$  = 6.5 Hz, 2H, C-6- $OCH_2$ ), 6.99–7.03 (m, 2H, 3'-H), 7.03–7.08 (m, 2H, 5-H, 7-H), 7.33 (s, 1H, 3-H), 7.94–8.00 (m, 2H, 2'-H), 8.17 (d,  $J$  = 11.1 Hz, 1H, C-4), 8.40 (d,  $J$  = 10.8 Hz, 1H, C-8) ppm;  $^{13}C$  NMR (126 MHz,  $CDCl_3$ ):  $\delta$  = 14.2 ( $CH_3$ ), 22.7, 26.0, 26.1, 29.1, 29.3, 29.4, 29.4, 29.5, 29.6, 29.6, 29.7, 29.7, 32.0 ( $CH_2$ ), 68.2 (C-4'- $OCH_2$ ), 69.4 (C-6- $OCH_2$ ), 93.7 (C-1), 114.0 (C-5/C-7), 115.0 (C-3'), 116.4 (C-3), 116.8 (C-5/C-7), 118.9 (C-2), 127.2 (C-1'), 129.5 (C-2'), 134.6 (C-8), 136.7 (C-4), 138.0 (C-3a), 141.0 (C-8a), 147.9 (CN), 159.8 (C-4'), 167.9 (C-6) ppm; FT-IR (ATR):  $\tilde{\nu}$  = 2953 (m), 2917 (s), 2850 (s), 2198 (m), 1606 (s), 1583 (m), 1545 (m), 1526 (m), 1463 (s), 1431 (s), 1394 (w), 1317 (w), 1288 (m), 1255 (s), 1197 (s), 1183 (s), 1158 (w), 1130 (w), 1022 (m), 1000 (m), 974 (w), 904 (w), 830 (s), 807 (w), 791 (w), 766 (w), 720 (m), 622 (w), 541 (w), 510 (w)  $cm^{-1}$ ; MS(ESI):  $m/z$  for  $C_{41}H_{59}NNaO_2^+$  calc.: 620.44  $[M+Na]^+$ , found.: 620.43; HRMS(ESI):  $m/z$  for  $C_{41}H_{59}NNaO_2^+$  calc.: 620.4438  $[M+Na]^+$ , found.: 620.4349.

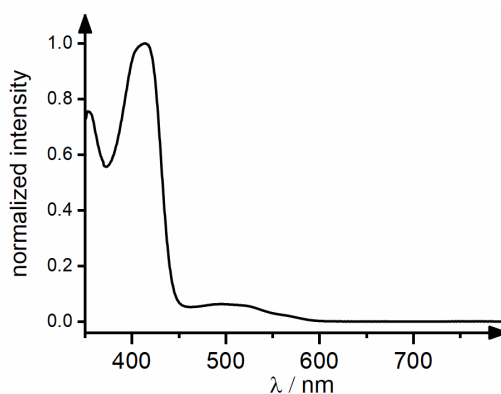

Figure S2: Normalized UV/VIS spectra of **12O-AzCN-PhO12** in chloroform.

### 6-Hexadecyloxy-2-(4-hexadecyloxyphenyl)azulene-1-carbonitrile (**16O-AzCN-PhO16**)

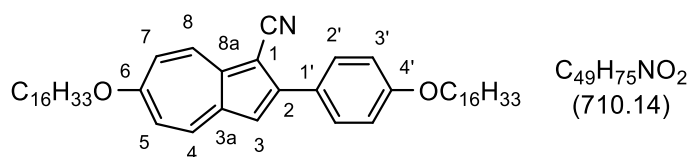

Synthesis according to GP2; **16O-AzCN-Br** (16 mg, 34  $\mu$ mol), 4-hexadecyloxyphenyl boronic acid (25 mg, 68  $\mu$ mol);  $Pd(PPh_3)_4$  (4 mg, 3  $\mu$ mol),  $Cs_2CO_3$  (33 mg, 102  $\mu$ mol), dioxane (3 mL); yield: orange solid (17 mg, 34  $\mu$ mol, 71 %); melting behavior: Cr 94 °C SmC 135 °C SmA 138 °C I;  $^1H$  NMR (700 MHz,  $CDCl_3$ ):  $\delta$  = 0.88 (t,  $J$  = 7.0 Hz, 6H,  $CH_3$ ), 1.21–1.41 (m, 48H,  $CH_2$ ), 1.44–1.53 (m, 4H,  $OCH_2CH_2CH_2$ ), 1.82 (tt,  $J$  = 6.8 Hz, 6.6 Hz, 2H,  $OCH_2CH_2$ ), 1.88 (tt,  $J$  = 6.7 Hz, 6.5 Hz, 2H,  $OCH_2CH_2$ ), 4.03 (t,  $J$  = 6.6 Hz, 2H, 4'- $OCH_2$ ), 4.14 (t,  $J$  = 6.5 Hz, 2H, 6- $OCH_2$ ), 7.00–7.03 (m, 2H, 3'-H), 7.05–7.09 (m, 2H, 5-H, 7-H), 7.35 (s, 1H, 3-H), 7.93–8.00 (m, 2H, 2'-H), 8.19 (d,  $J$  = 10.9 Hz, 1H, 4-H), 8.42 (d,  $J$  = 10.7 Hz, 1H, 8-H) ppm;  $^{13}C$  NMR (176 MHz,  $CDCl_3$ ):  $\delta$  = 14.2 ( $CH_3$ ), 22.7, 26.0, 26.1, 29.1, 29.3, 29.3, 29.4, 29.4, 29.6, 29.6, 29.6, 29.6, 29.7, 29.7, 29.7, 29.7, 29.7, 32.0 ( $CH_2$ ), 68.2 (4'- $OCH_2$ ), 69.4 (6- $OCH_2$ ), 93.7 (C-1), 114.0 (C-7), 115.1 (C-3'), 116.4 (C-3), 116.9 (C-5), 118.9 (CN), 127.2 (C-1'), 129.5 (C-2'), 134.6 (C-8), 136.7 (C-4), 138.0 (C-3a), 141.0 (C-8a), 148.0 (C-2), 159.8 (C-4'), 167.9 (C-6) ppm; FT-IR (ATR):  $\tilde{\nu}$  = 2954 (w), 2916 (s), 2850 (s), 2204 (w), 1606 (w), 1584 (w), 1546 (w), 1526 (w), 1465 (m), 1432 (m), 1288 (w), 1256 (m), 1199 (m), 1043 (w), 1018 (w), 999 (w), 904 (w), 828 (w), 807 (w), 788 (w), 719 (w), 622 (w), 509 (w)  $cm^{-1}$ ; MS (EI):  $m/z$  for  $C_{37}H_{52}NO_2^+$  calc.: 709.6  $[M]^+$ , found: 709.6; HRMS (ESI):  $m/z$  for  $C_{37}H_{52}NO_2Na^+$  calc.: 732.5690  $[M+Na]^+$ , found.: 732.5690.

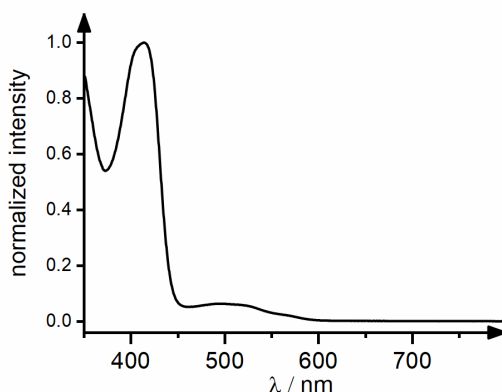

Figure S3: Normalized UV/VIS spectra of **16O-AzCN-PhO16** in chloroform.

### 6-Hexadecyloxy-2-(4-octyloxyphenyl)azulene-1-carbonitrile (**16O-AzCN-PhO8**)

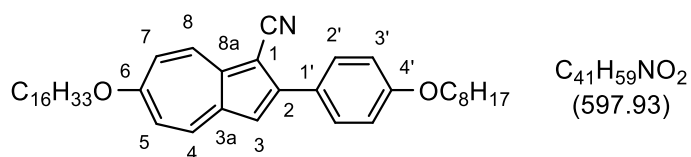

Synthesis according to GP2; **16O-AzCN-Br** (44 mg, 93  $\mu$ mol), 4-octyloxyphenylboronic acid (47 mg, 186  $\mu$ mol);  $Pd(PPh_3)_4$  (11 mg, 9  $\mu$ mol),  $Cs_2CO_3$  (91 mg, 279  $\mu$ mol), dioxane (5 mL); yield: orange solid (42 mg, 70  $\mu$ mol, 75 %); melting behavior: Cr 86 °C SmC 137 °C SmA 151 °C I;  $^1H$  NMR (700 MHz,  $CDCl_3$ ):  $\delta$  = 0.86–0.92 (m, 6H,  $CH_3$ ), 1.20–1.42 (m, 32H,  $CH_2$ ), 1.46–1.53 (m, 4H,  $OCH_2CH_2CH_2$ ), 1.79–1.84 (m, 2H,  $OCH_2CH_2$ ), 1.84–1.89 (m, 2H,  $OCH_2CH_2$ ), 4.02 (t,  $J$  = 6.6 Hz, 2H, 6- $OCH_2$ ), 4.13 (t,  $J$  = 6.5 Hz, 2H, 4'- $OCH_2$ ), 7.00–7.03 (m, 2H, 3'-H), 7.04–7.07 (m, 2H, 5-H, 7-H), 7.34 (s, 1H, 3-H), 7.94–8.00 (m, 2H, 2'-H), 8.17 (d,  $J$  = 11.2 Hz, 1H, 4-H), 8.40 (d,  $J$  = 10.8 Hz, 1H, 8-H) ppm;  $^{13}C$  NMR (176 MHz,  $CDCl_3$ ):  $\delta$  = 14.1, 14.1 ( $CH_3$ ), 22.7, 22.7, 26.0, 26.1, 29.1, 29.3, 29.3, 29.3, 29.4, 29.4, 29.6, 29.6, 29.7, 29.7, 29.7, 29.7, 31.9, 32.0 ( $CH_2$ ), 68.2 (4'- $OCH_2$ ), 69.4 (6- $OCH_2$ ), 93.7 (C-1), 114.0 (C-7), 115.1 (C-3'), 116.4 (C-3), 116.8 (C-5), 118.9 (CN), 127.2 (C-1'), 129.5 (C-2'), 134.6 (C-8), 136.7 (C-4), 138.0 (C-3a), 141.0 (C-8a), 147.9 (C-2), 159.8 (C-4'), 167.9 (C-6) ppm; FT-IR (ATR):  $\tilde{\nu}$  = 3072 (w), 3042 (w), 2956 (m), 2920 (s), 2871 (m), 2851 (s), 2729 (w), 2196 (m), 1605 (m), 1584 (m), 1546 (w), 1525 (m), 1488 (w), 1463 (m), 1425 (s), 1390 (w), 1287 (m), 1251 (s), 1198 (s), 1182 (m), 1142 (w), 1109 (w), 1087 (w), 1043 (w), 1030 (w), 1002 (w), 999 (w), 906 (w), 834 (m), 795 (w), 764 (w), 736 (m), 723 (w), 622 (w), 540 (w), 511 (w)  $cm^{-1}$ ; MS (ESI):  $m/z$  for  $C_{41}H_{60}NO_2^+$  calc.: 598.46  $[M+H]^+$ , found.: 598.46; HRMS (ESI):  $m/z$  for  $C_{41}H_{60}NO_2^+$  calc.: 598.4619  $[M+H]^+$ , found.: 598.4601.

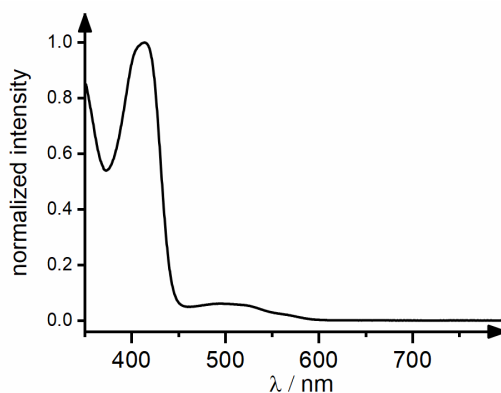

Figure S4: Normalized UV/VIS spectra of **16O-AzCN-PhO8** in chloroform.

## 2-(4-Hexadecyloxyphenyl)-6-octyloxyazulene-1-carbonitrile (8O-AzCN-PhO16)

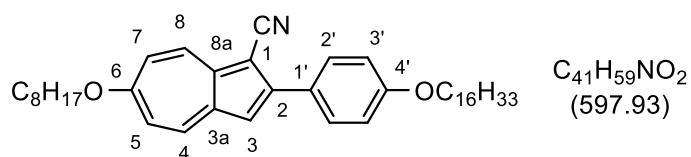

Synthesis according to GP2; **8O-AzCN-Br** (77 mg, 278  $\mu\text{mol}$ ), 4-hexadecyloxyphenyl boronic acid (155 mg, 833  $\mu\text{mol}$ );  $\text{Pd}(\text{PPh}_3)_4$  (25 mg, 21  $\mu\text{mol}$ ),  $\text{Cs}_2\text{CO}_3$  (209 mg, 641  $\mu\text{mol}$ ), dioxane (5 mL); yield: orange solid (127 mg, 212  $\mu\text{mol}$ , 99 %); melting behavior: Cr 95 °C SmA 147 °C I;  $^1\text{H}$  NMR (500 MHz,  $\text{CDCl}_3$ ):  $\delta$  = 0.86–0.92 (m, 6H), 1.21–1.43 (m, 32H,  $\text{CH}_2$ ), 1.43–1.54 (m, 4H,  $\text{OCH}_2\text{CH}_2\text{CH}_2$ ), 1.77–1.91 (m, 4H,  $\text{OCH}_2\text{CH}_2$ ), 4.02 (t,  $J$  = 6.5 Hz, 2H, 6- $\text{OCH}_2$ ), 4.13 (t,  $J$  = 6.5 Hz, 2H, 4'- $\text{OCH}_2$ ), 7.00–7.03 (m, 2H, 3'-H), 7.03–7.08 (m, 2H, 5-H, 7-H), 7.34 (s, 1H, 3-H), 7.94–7.99 (m, 2H, 2'-H), 8.17 (d,  $J$  = 11.2 Hz, 1H, 4-H), 8.41 (d,  $J$  = 10.8 Hz, 1H, 8-H) ppm;  $^{13}\text{C}$  NMR (126 MHz,  $\text{CDCl}_3$ ):  $\delta$  = 14.1, 14.2 ( $\text{CH}_3$ ), 22.7, 22.7, 26.0, 26.1, 29.1, 29.2, 29.3, 29.3, 29.4, 29.4, 29.6, 29.6, 29.7, 29.7, 31.8, 32.0 ( $\text{CH}_2$ ), 68.2 (4'- $\text{OCH}_2$ ), 69.4 (6- $\text{OCH}_2$ ), 93.7 (C-1), 114.0 (C-7), 115.0 (C-3'), 116.4 (C-3), 116.8 (C-5), 118.9 (CN), 127.2 (C-1'), 129.5 (C-2'), 134.6 (C-8), 136.7 (C-4), 138.0 (C-3a), 141.0 (C-8a), 147.9 (C-2), 159.8 (C-4'), 167.9 (C-6) ppm; FT-IR (ATR):  $\tilde{\nu}$  = 2919 (s), 2851 (s), 2197 (w), 1606 (m), 1584 (m), 1546 (w), 1526 (w), 1464 (m), 1431 (m), 1392 (w), 1289 (w), 1257 (m), 1199 (m), 1183 (m), 1027 (w), 1000 (w), 904 (w), 832 (m), 793 (w), 771 (w), 722 (w), 622 (w), 510 (w)  $\text{cm}^{-1}$ ; MS (ESI):  $m/z$  for  $\text{C}_{41}\text{H}_{60}\text{NO}_2^+$  calc.: 598.46  $[\text{M}+\text{H}]^+$ , found.: 598.46; HRMS (ESI):  $m/z$  for  $\text{C}_{41}\text{H}_{60}\text{NO}_2^+$  calc.: 598.4619  $[\text{M}+\text{H}]^+$ , found.: 598.4611.

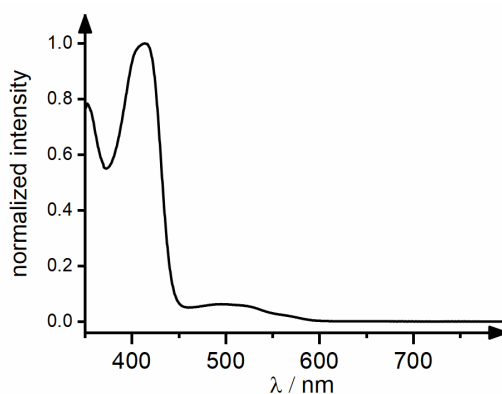

Figure S5: Normalized UV/VIS spectra of **8O-AzCN-PhO16** in chloroform.

### 3. Differential Scanning Calorimetry

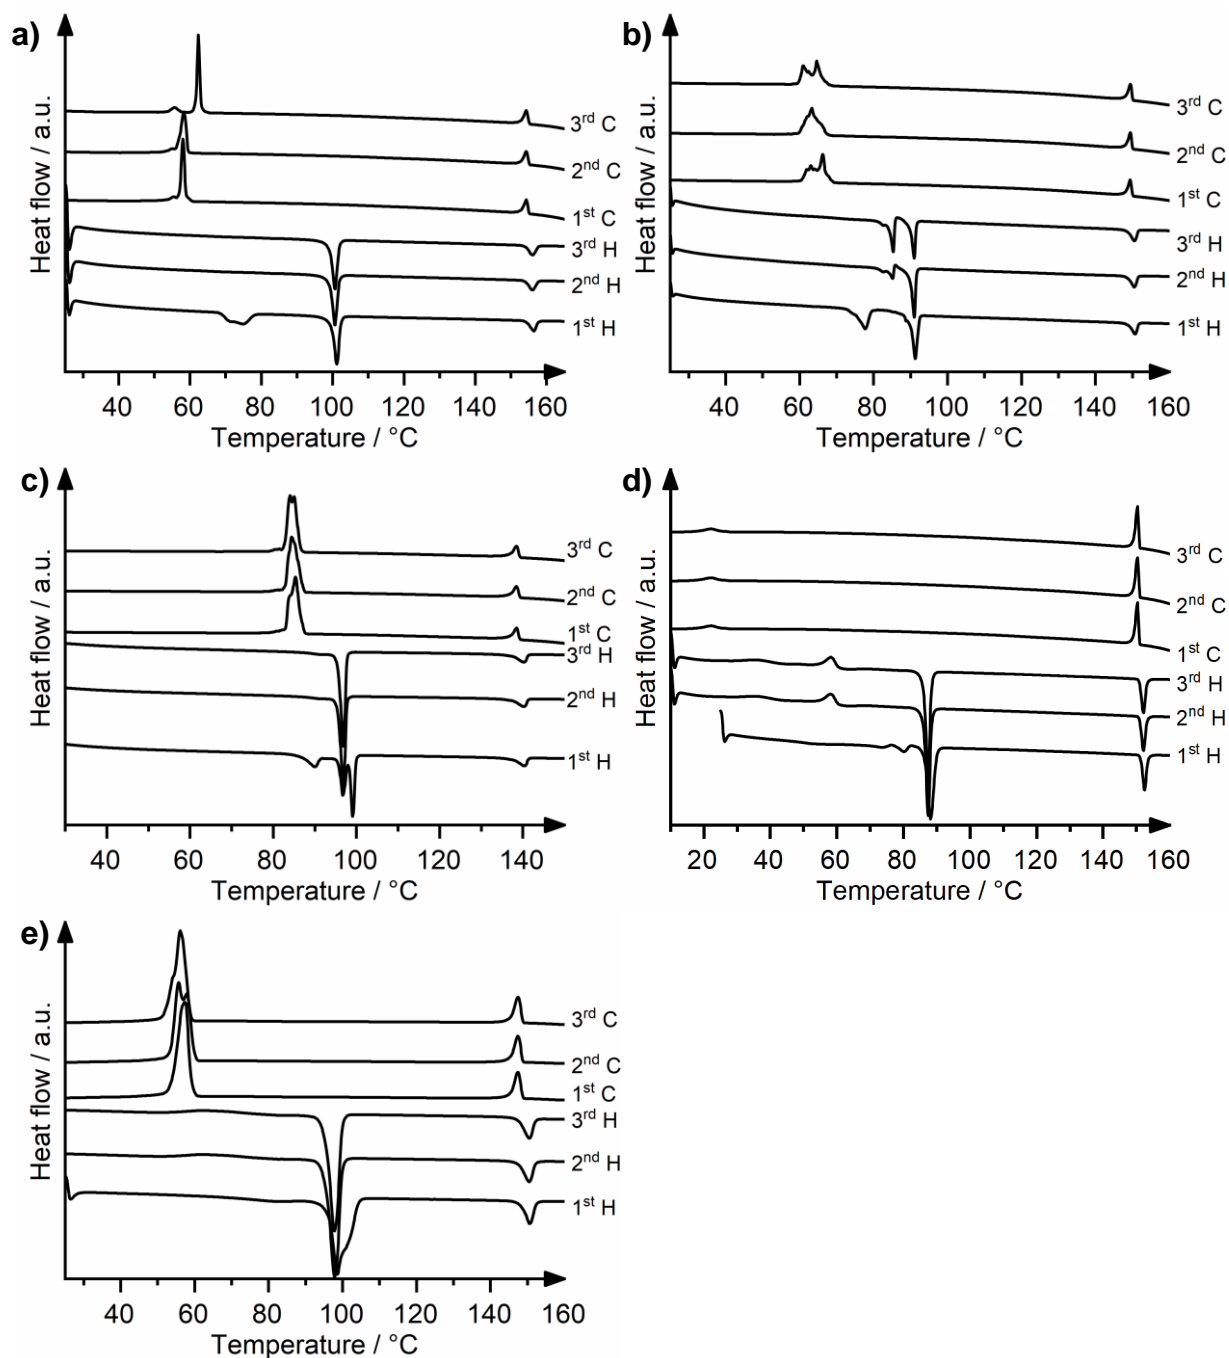

Figure S6: DSC-curves of azulenes **nO-AzCN-PhOm**: a) **8O-AzCN-PhO8** b) **12O-AzCN-PhO12** c) **16O-AzCN-PhO16** d) **16O-AzCN-PhO8** e) **8O-AzCN-PhO16**. The SmA-SmC transition is not visible. Heating / cooling rate: 5 K/min, H = Heating, C = Cooling.

## 4. Polarizing Optical Microscopy (POM)

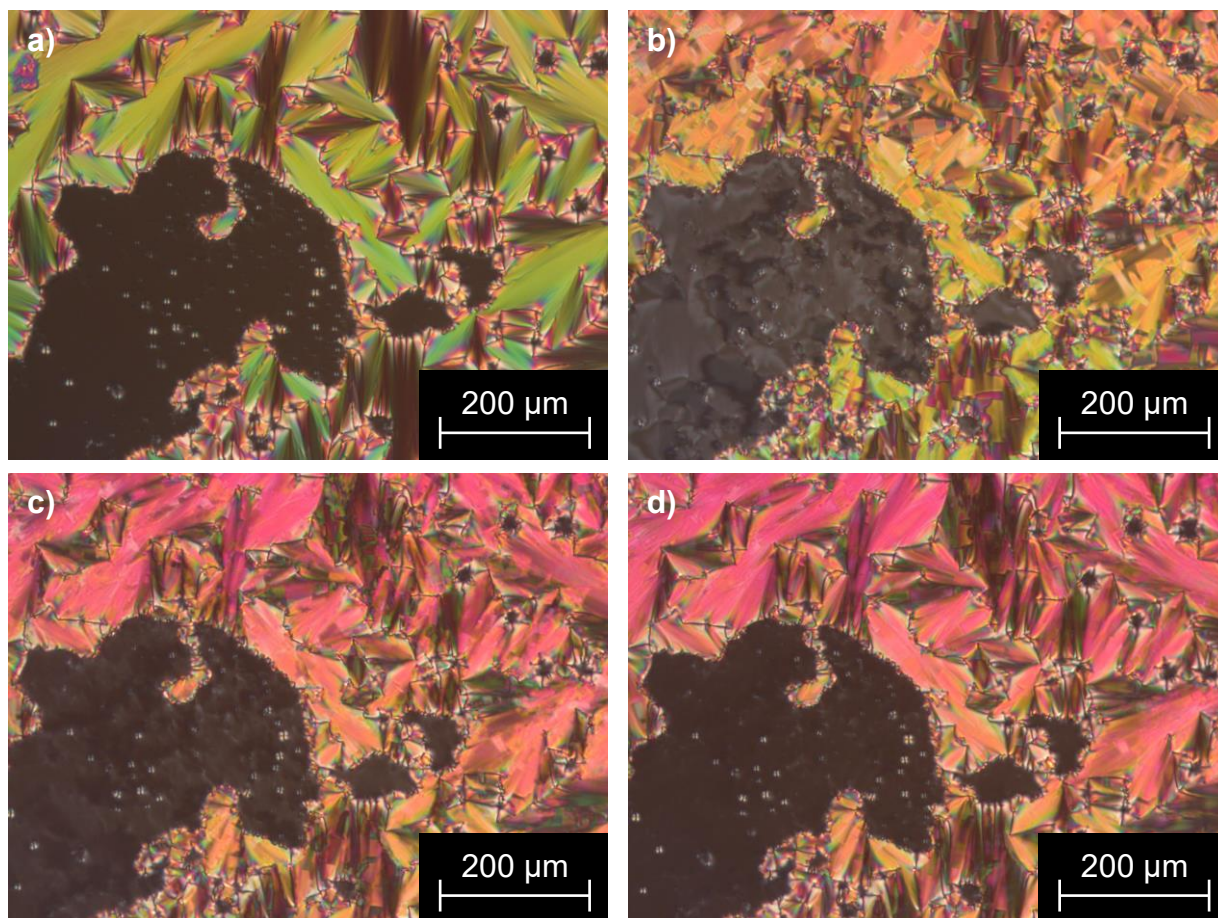

Figure S7: POM micrographs between crossed polarizers of **16O-AzCN-PhO8**: a) Fan textures and Maltese crosses of a SmA phase at 144 °C upon cooling from the isotropic liquid (cooling rate 2 K/min) that transform into b) broken fan and Schlieren textures of a SmC phase at 128 °C. c) shows the same frame of the SmC phase directly before the SmA reentrance phase at 80 °C. d) The Schlieren textures disappear and the broken fans recombine after completion of the reentrance at 75 °C.

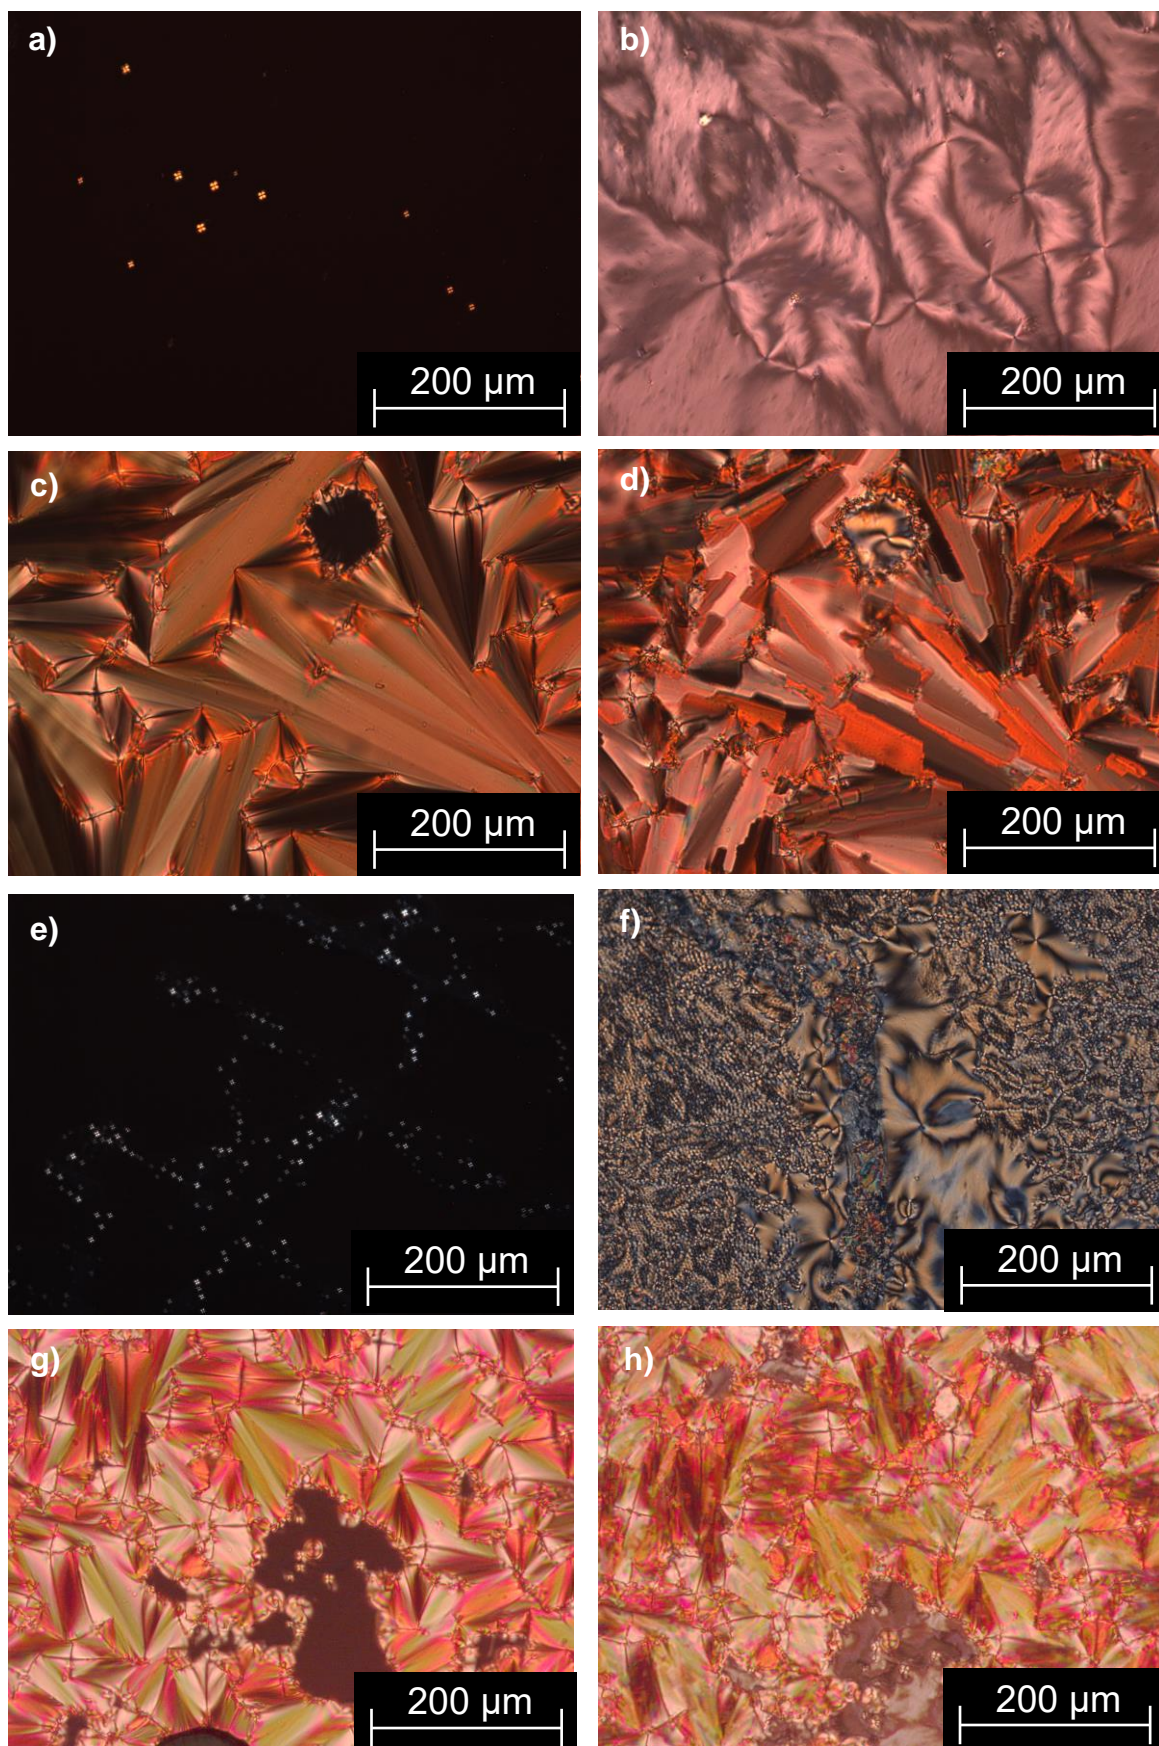

Figure S8: POM micrographs of the observed textures between crossed polarizers upon cooling from the isotropic liquid (2 K/min): a) Maltese crosses of **8O-AzCN-PhO8** at 159 °C and b) Schlieren textures at 86 °C; c) and d) fan- and broken fan textures at the same position for **12O-AzCN-PhO12** at 139 °C and 104 °C, e) and f) Maltese crosse and Schlieren textures of **16O-AzCN-PhO16** at 137 °C and 122 °C; g) and h): fan and broken fan textures of **8O-AzCN-PhO16** at 106 °C and 75 °C.

## 5. X-Ray Diffractometry

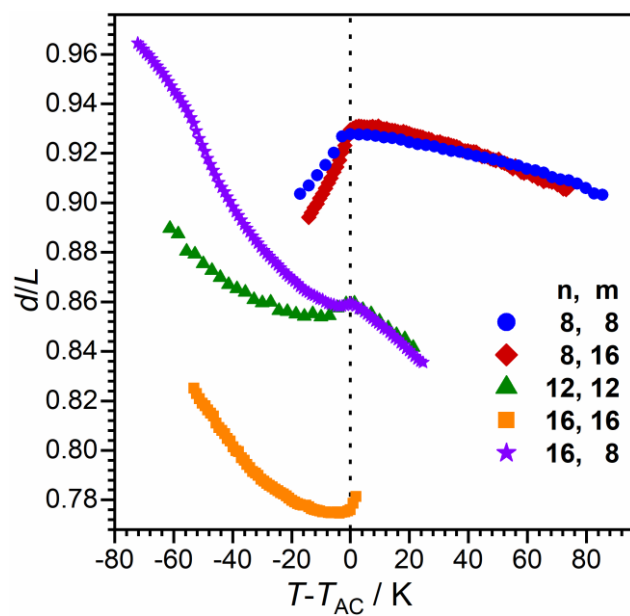

Figure S9: Plot of the relative layer thickness  $d/L$  as a function of the temperature for all investigated compounds.

## 6. Single Crystal X-Ray Data

The crystal structures were obtained by allowing the solvent to evaporate slowly in a NMR tube at room temeparture.

Table S1: Refinement data of the single crystal structures

| Compound                                  | 8O-AzCN-PhO8          | 8O-AzCN-PhO16         | 12O-AzCN-PhO12        | 16O-AzCN-PhO8         | 16O-AzCN-PhO16        |
|-------------------------------------------|-----------------------|-----------------------|-----------------------|-----------------------|-----------------------|
| CCDC number                               | CCDC 2215784          | CCDC 2215785          | CCDC 2215787          | CCDC 2215788          | CCDC 2215789          |
| formula                                   | C33H43NO2             | C41H59NO2             | C41H59NO2             | C41H59NO2             | C49H75NO2             |
| formula weight (g/mol)                    | 485.68                | 597.89                | 597.89                | 597.89                | 710.10                |
| crystal size (mm)                         | 0.567 x 0.455 x 0.144 | 0.594 x 0.127 x 0.074 | 0.234 x 0.090 x 0.041 | 0.352 x 0.146 x 0.120 | 0.234 x 0.072 x 0.040 |
| temperature (K)                           | 140(2)                | 140(2)                | 145(2)                | 140(2)                | 145(2)                |
| wavelength $\lambda$ (Å)                  | 0.71073               | 0.71073 Å             | 1.54178               | 0.71073               | 0.71073               |
| crystal system                            | Triclinic             | Monoclinic            | Triclinic             | Triclinic             | Triclinic             |
| space group                               | P-1                   | P2(1)/c               | P-1                   | P-1                   | P1                    |
| unit cell dimension                       |                       |                       |                       |                       |                       |
| <i>a</i> (Å)                              | 11.2228(11)           | 31.2817(18)           | 8.1653(13)            | 8.1918(6)             | 7.2017(4)             |
| <i>b</i> (Å)                              | 12.1634(6)            | 5.5982(3)             | 9.8958(15)            | 9.9946(7)             | 15.2415(9)            |
| <i>c</i> (Å)                              | 12.4879(6)            | 21.1584(13)           | 23.177(4)             | 22.1775(13)           | 40.140(3)             |
| $\alpha$ (deg)                            | 117.700(2)            | 90                    | 88.317(12)            | 93.108(4)             | 80.771(5)             |
| $\beta$ (deg)                             | 110.189(3)            | 105.680(3)            | 80.397(12)            | 90.023(4)             | 87.247(4)             |
| $\gamma$ (deg)                            | 92.934(3)             | 90                    | 74.704(13)            | 104.781(4)            | 79.223(4)             |
| <i>V</i> (Å <sup>3</sup> )                | 1369.89(17)           | 3567.4(4)             | 1780.9(5)             | 1752.9(2)             | 4271.5(5)             |
| <i>Z</i>                                  | 2                     | 4                     | 2                     | 2                     | 4                     |
| <i>D<sub>c</sub></i> (g/cm <sup>3</sup> ) | 1.177                 | 1.113                 | 1.115                 | 1.113                 | 1.104                 |
| $\mu$ (mm <sup>-1</sup> )                 | 0.072                 | 0.066                 | 0.506                 | 0.068                 | 0.065                 |

|                                                 |                                             |                                             |                                             |                                             |                                             |
|-------------------------------------------------|---------------------------------------------|---------------------------------------------|---------------------------------------------|---------------------------------------------|---------------------------------------------|
| F(000)                                          | 528                                         | 1312                                        | 656                                         | 656                                         | 1568                                        |
| theta range for data collection                 | 1.955 to 28.467                             | 1.930 to 28.356                             | 3.869 to 64.992                             | 1.839 to 28.374                             | 1.376 to 24.999                             |
| index ranges                                    | -15<=h<=15,<br>-16<=k<=16,<br>-16<=l<=16    | -41<=h<=41,<br>-7<=k<=7,<br>-28<=l<=28      | -9<=h<=9,<br>-11<=k<=11<br>-26<=l<=24       | -10<=h<=10,<br>-13<=k<=13,<br>-29<=l<=29    | -8<=h<=8,<br>-18<=k<=18,<br>-47<=l<=47      |
| reflection collected/unique                     | 34547 / 6849<br>[R(int) = 0.0264]           | 49204 / 8892<br>[R(int) = 0.0412]           | 19439 / 5823<br>[R(int) = 0.0529]           | 38246 / 8720<br>[R(int) = 0.0377]           | 53692 / 27012<br>[R(int) = 0.0931]          |
| completeness to theta                           | 100.0 %                                     | 99.9 %                                      | 96.2 %                                      | 100.0 %                                     | 99.9 %                                      |
| max. and min. transmission                      | 0.7457 and 0.7155                           | 0.7457 and 0.7042                           | 0.8642 and 0.7096                           | 0.7444 and 0.7247                           | 0.8619 and 0.8065                           |
| refinement methods                              | Full-matrix least-squares on F <sup>2</sup> |
| data/restraints/parameter                       | 6849 / 0 / 327                              | 8892 / 0 / 399                              | 5823 / 0 / 399                              | 8720 / 0 / 399                              | 27012 / 1204 / 1881                         |
| GOF on F <sup>2</sup>                           | 1.043                                       | 1.039                                       | 1.013                                       | 1.001                                       | 1.004                                       |
| R <sub>1</sub> , wR <sub>2</sub> [I > 2σ(I)]    | R1 = 0.0503,<br>wR2 = 0.1125                | R1 = 0.0473,<br>wR2 = 0.1140                | R1 = 0.0483,<br>wR2 = 0.1154                | R1 = 0.0492,<br>wR2 = 0.1080                | R1 = 0.0847,<br>wR2 = 0.1274                |
| R <sub>1</sub> , wR <sub>2</sub> (all data)     | R1 = 0.0726,<br>wR2 = 0.1204                | R1 = 0.0816,<br>wR2 = 0.1248                | R1 = 0.0795,<br>wR2 = 0.1331                | R1 = 0.0968,<br>wR2 = 0.1196                | R1 = 0.2623,<br>wR2 = 0.1740                |
| largest diff. peak and hole (e/Å <sup>3</sup> ) | 0.588 and -0.374                            | 0.283 and -0.224                            | 0.158 and -0.208                            | 0.265 and -0.231                            | 0.595 and -0.337                            |

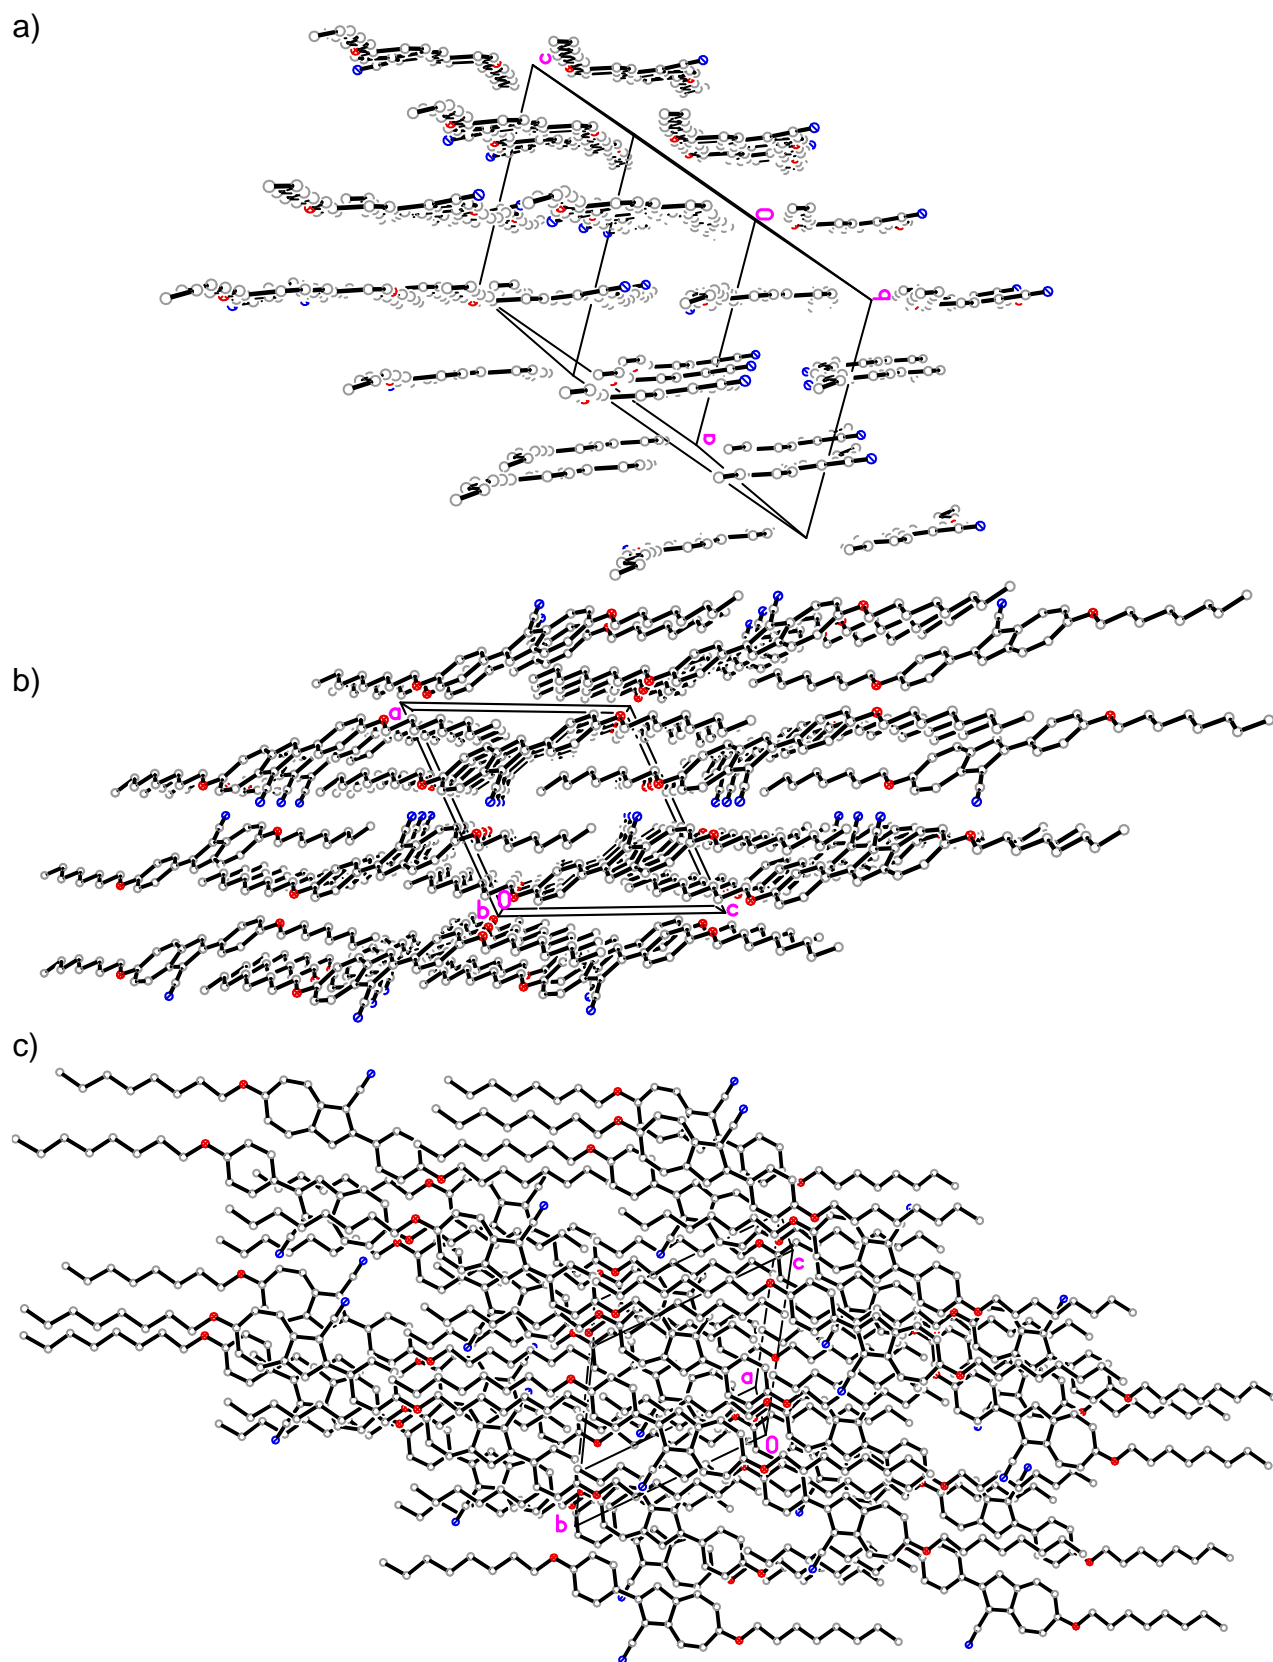

Figure S10: Single crystal X-Ray structure of **80-AzCN-PhO8**. Point of view a) along the long molecule axis, b) along the b-axis and c) along the a-axis.

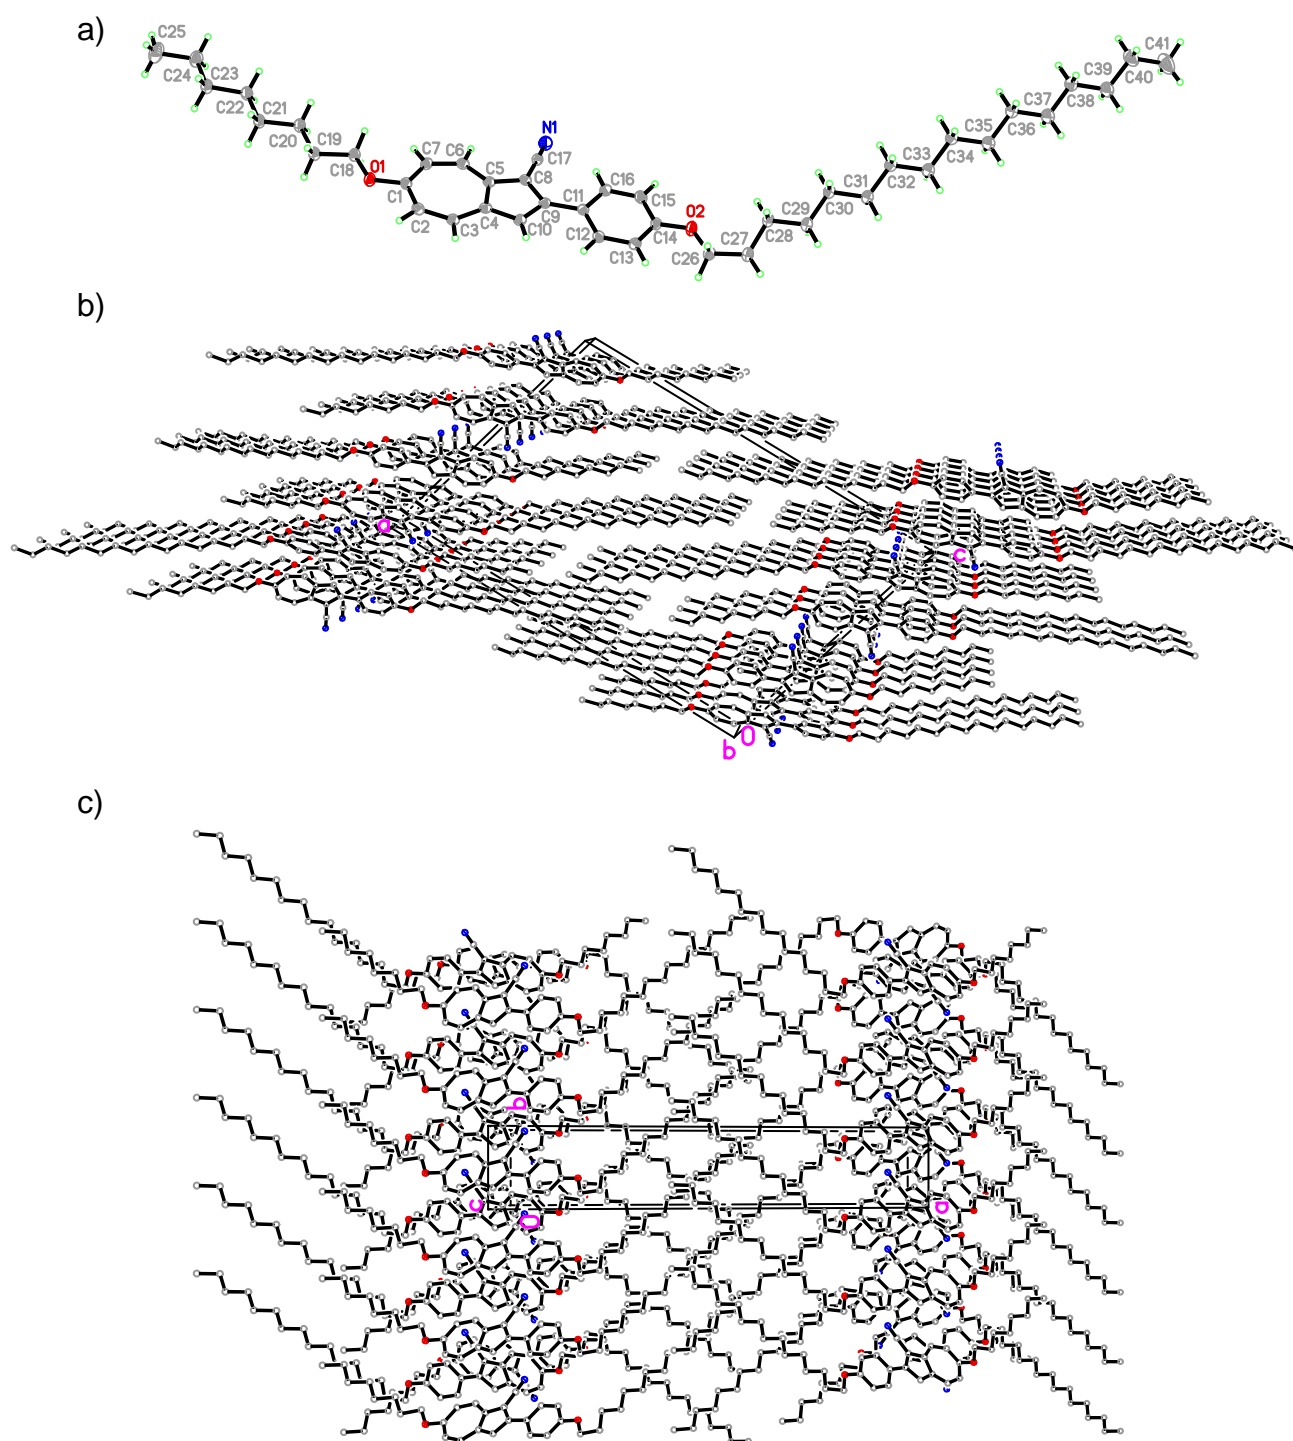

Figure S11: Single crystal X-Ray structure of **8O-AzCN-PhO16**. a) single molecule, b) point of view along the b-axis and c) along the c-axis.

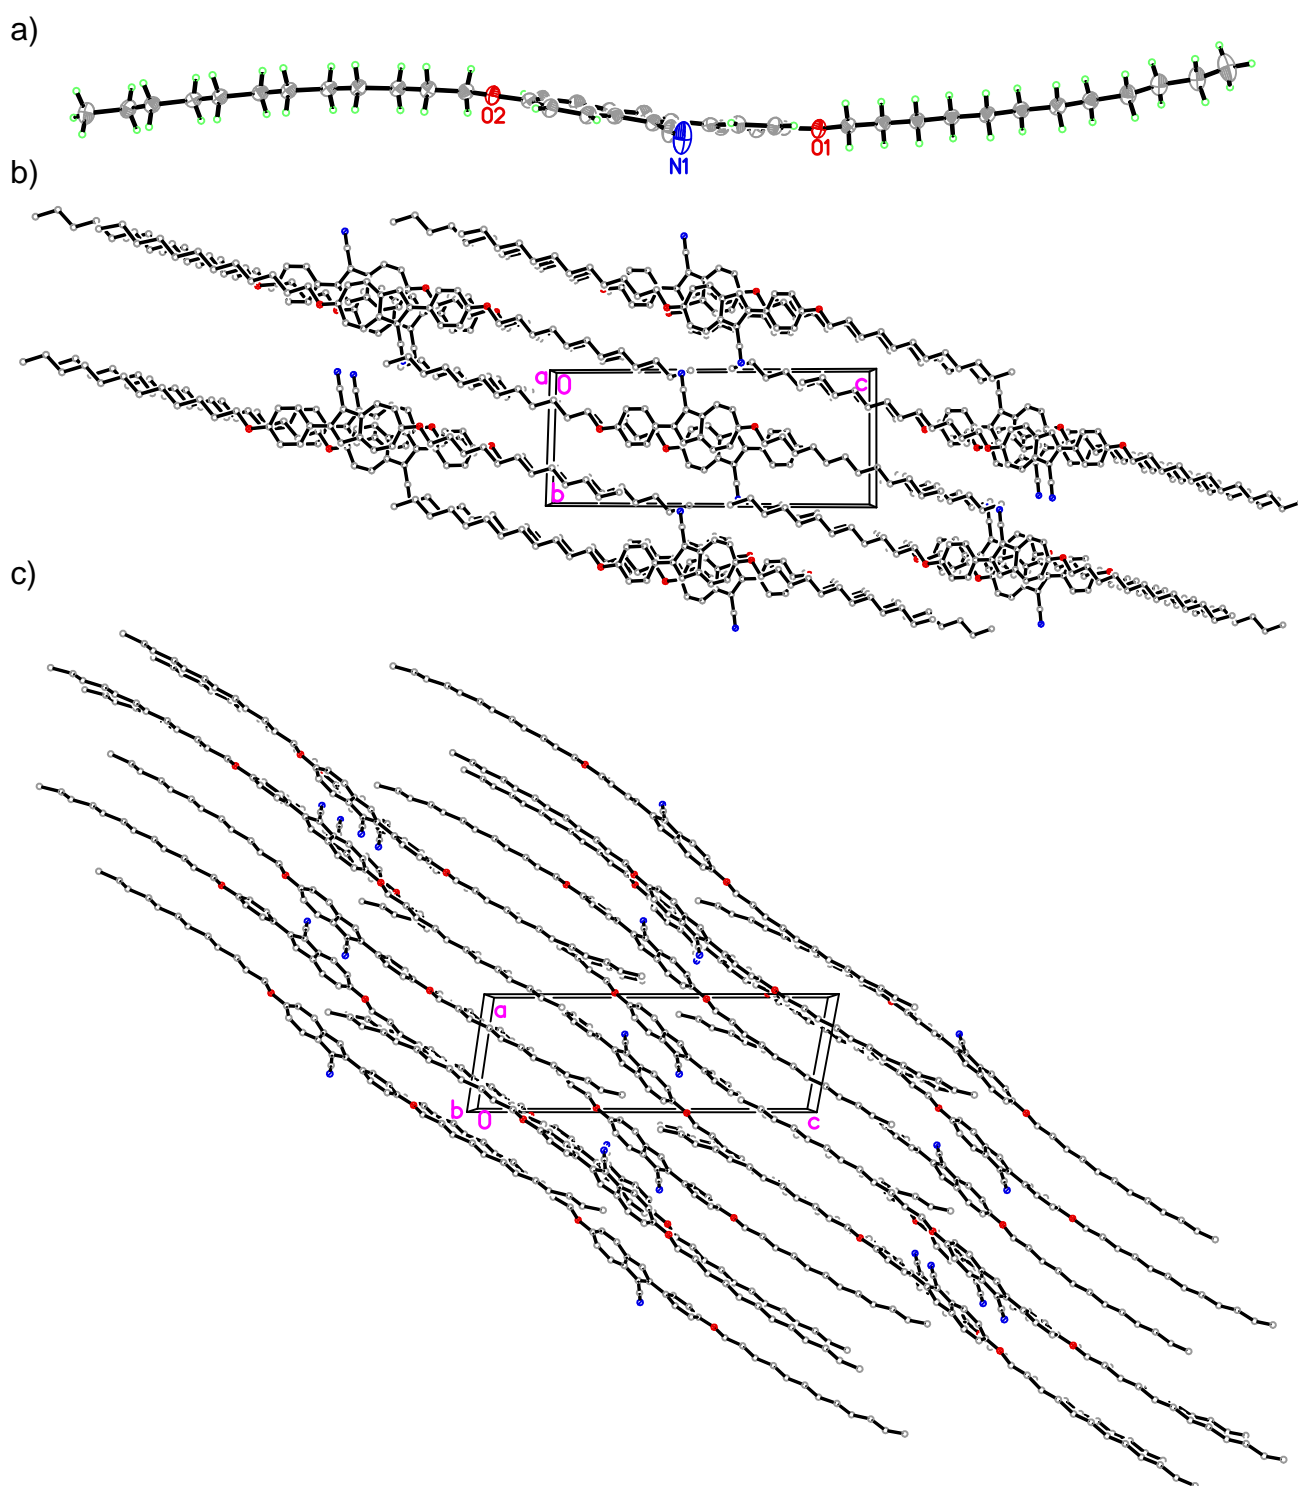

Figure S12: Single crystal X-Ray structure of **12O-AzCN-PhO12**. a) single molecule, b) point of view along the *a*-axis, and c) along the *b*-axis.

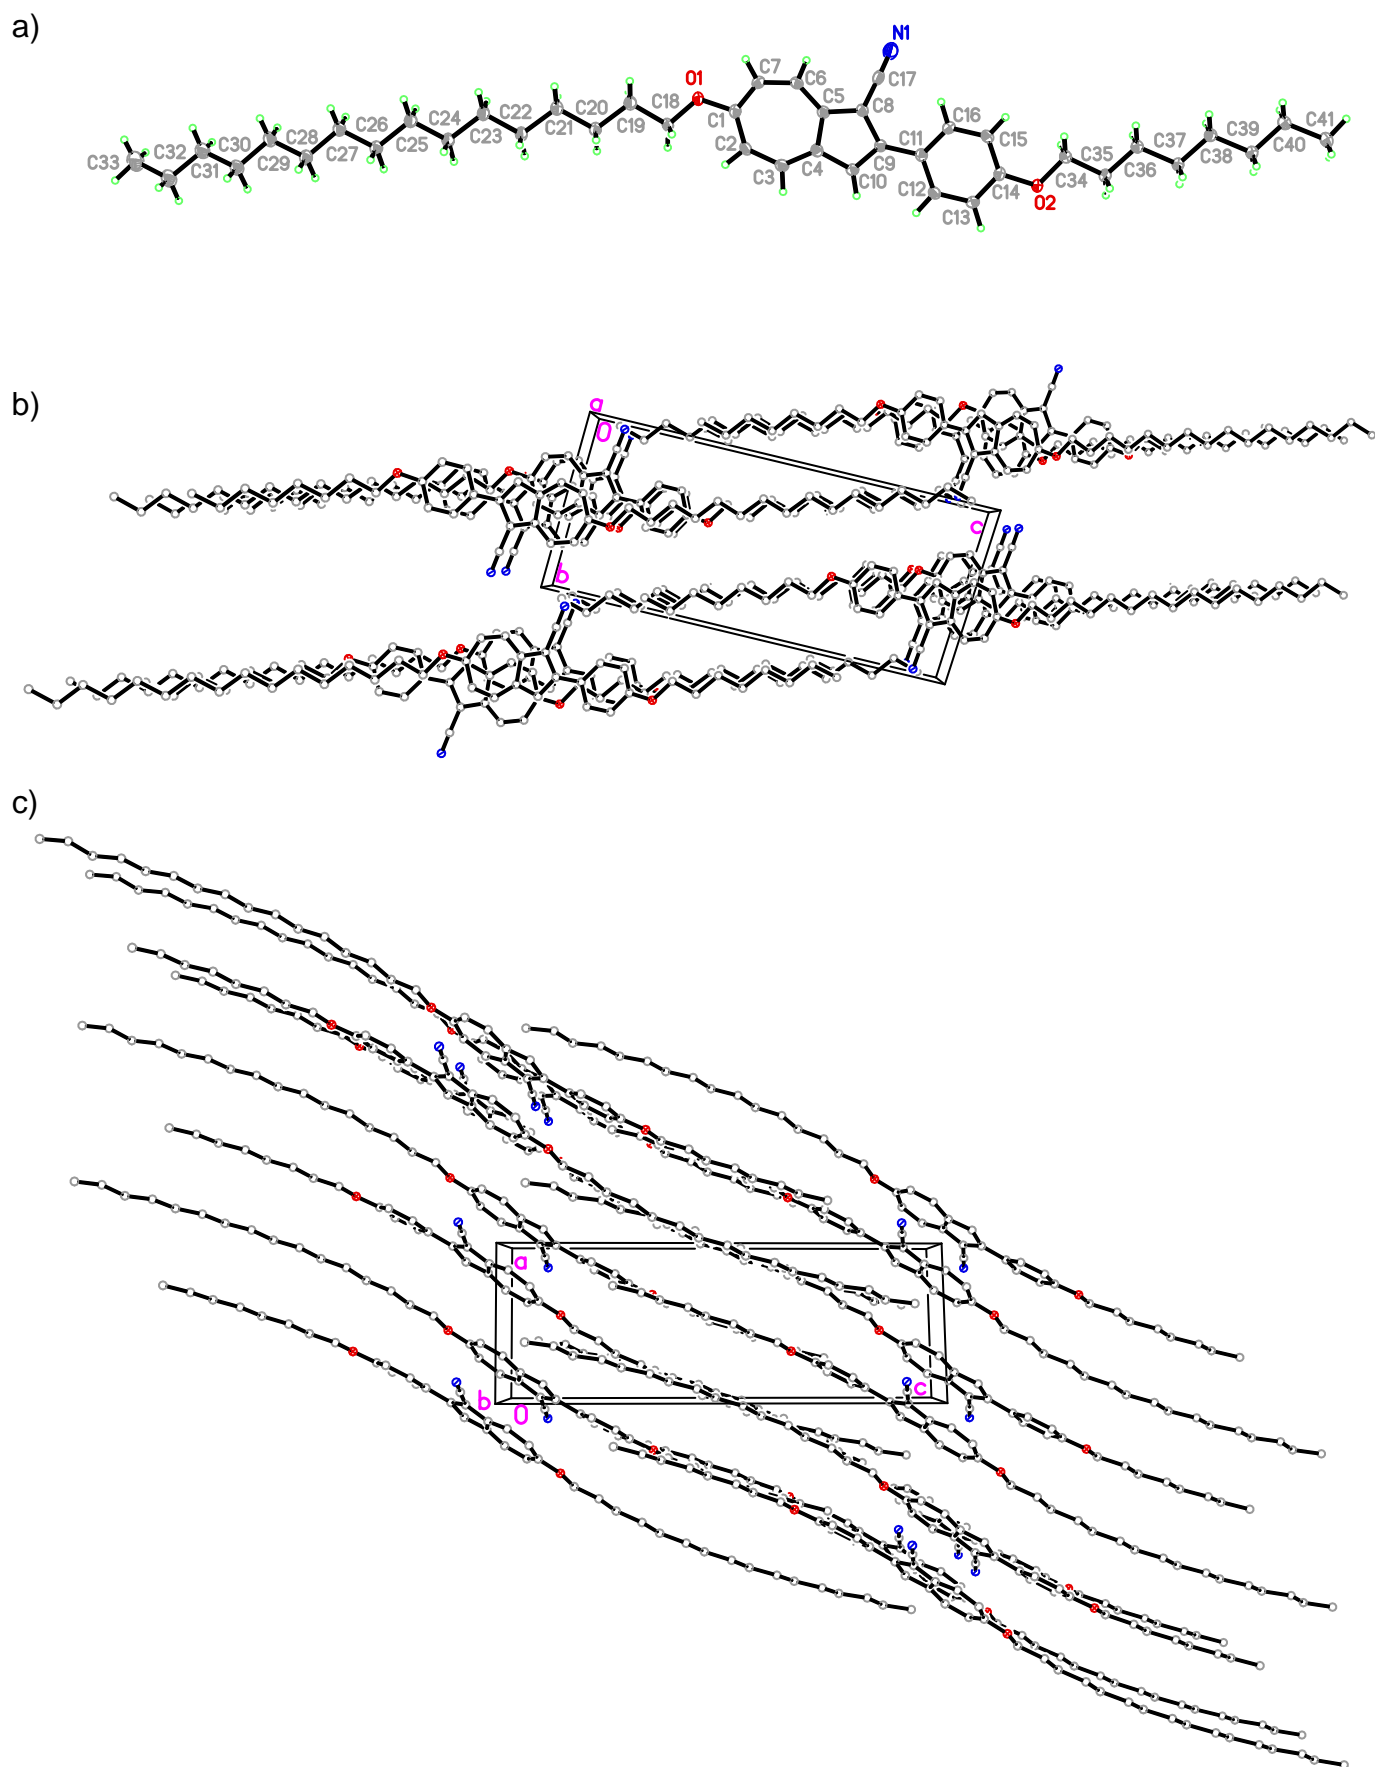

Figure S13: Single crystal X-Ray structure of **16O-AzCN-PhO8**. a) single molecule, b) point of view along the a-axis and c) along the b-axis.

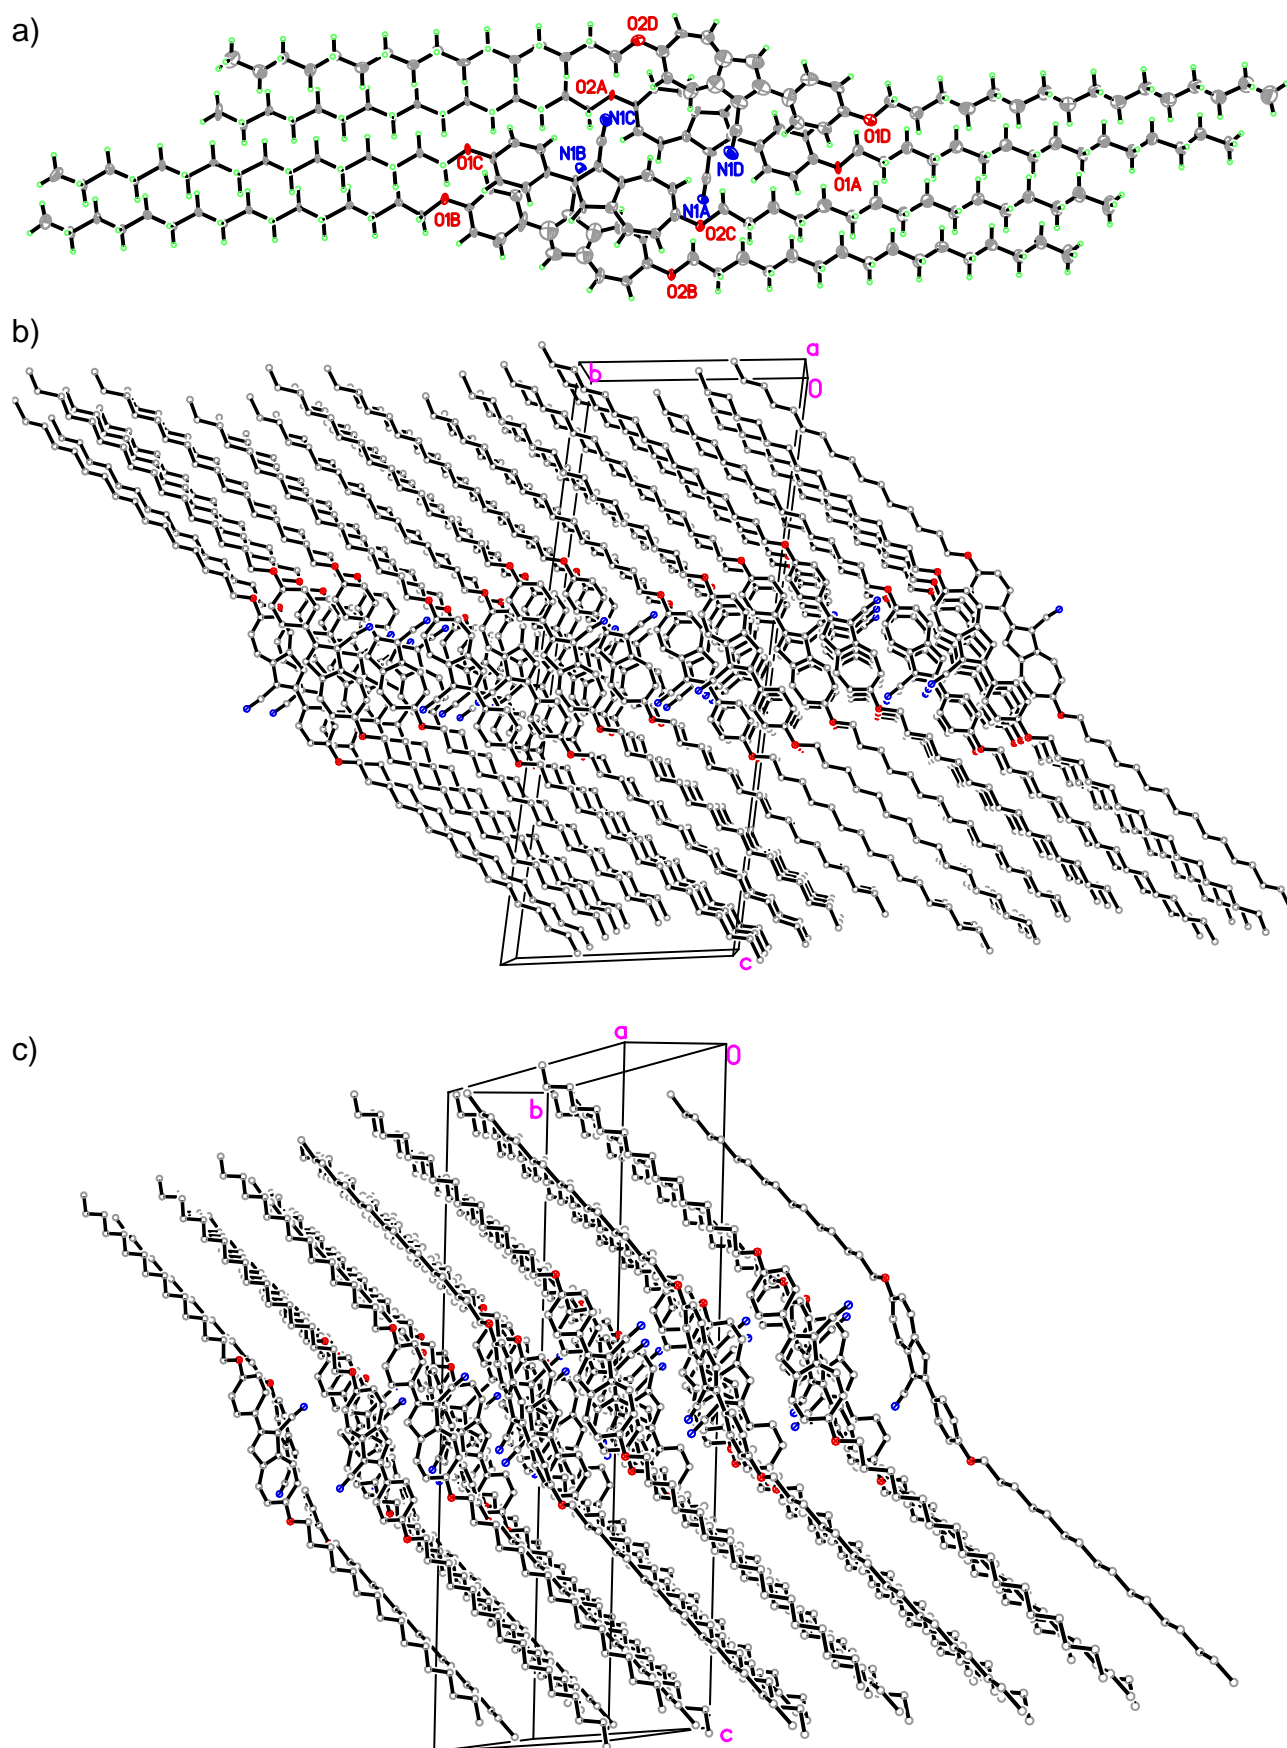

Figure S14: Single crystal X-Ray structure of **16O-AzCN-PhO16**. a) All four independent molecules of the unit cell, b) point of view along the a-axis, parallel to the ab-plane.

## 7. Literature

- 1 F. Schulz, P. Ehni, B. Wank, A. Bauer, W. Frey and S. Laschat, *Liq. Cryst.*, 2021, **48**, 832–843.
- 2 S. Ushijima and H. Togo, *Synlett*, 2010, **2010**, 1067–1070.

## 8. NMR-spectra

Mar12-2020.20.fid  
2 Schulz FIN-297

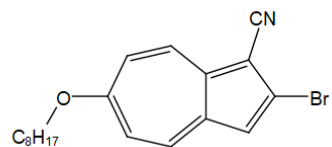

| Parameter                  | Value                                          |
|----------------------------|------------------------------------------------|
| 1 Data File Name           | N:/ data/ SCHULZ_500/ nmr/ Mar12-2020/ 20/ fid |
| 2 Title                    | Mar12-2020.20.fid                              |
| 3 Comment                  | 2 Schulz FIN-297                               |
| 4 Origin                   | Bruker BioSpin GmbH                            |
| 5 Owner                    | guest                                          |
| 6 Site                     |                                                |
| 7 Instrument               | spect                                          |
| 8 Author                   |                                                |
| 9 Solvent                  | CDCl3                                          |
| 10 Temperature             | 296.0                                          |
| 11 Pulse Sequence          | zg30                                           |
| 12 Experiment              | 1D                                             |
| 13 Probe                   | 5 mm PABBO BB-1H/ D Z-GRD Z800701/ 0072        |
| 14 Number of Scans         | 32                                             |
| 15 Receiver Gain           | 287.0                                          |
| 16 Relaxation Delay        | 2.0000                                         |
| 17 Pulse Width             | 11.2300                                        |
| 18 Presaturation Frequency |                                                |
| 19 Acquisition Time        | 1.5860                                         |
| 20 Acquisition Date        | 2020-03-12T09:18:00                            |
| 21 Modification Date       | 2020-03-12T09:18:13                            |
| 22 Class                   |                                                |
| 23 Spectrometer Frequency  | 500.16                                         |
| 24 Spectral Width          | 10330.6                                        |
| 25 Lowest Frequency        | -2092.6                                        |
| 26 Nucleus                 | 1H                                             |
| 27 Acquired Size           | 16384                                          |
| 28 Spectral Size           | 65536                                          |

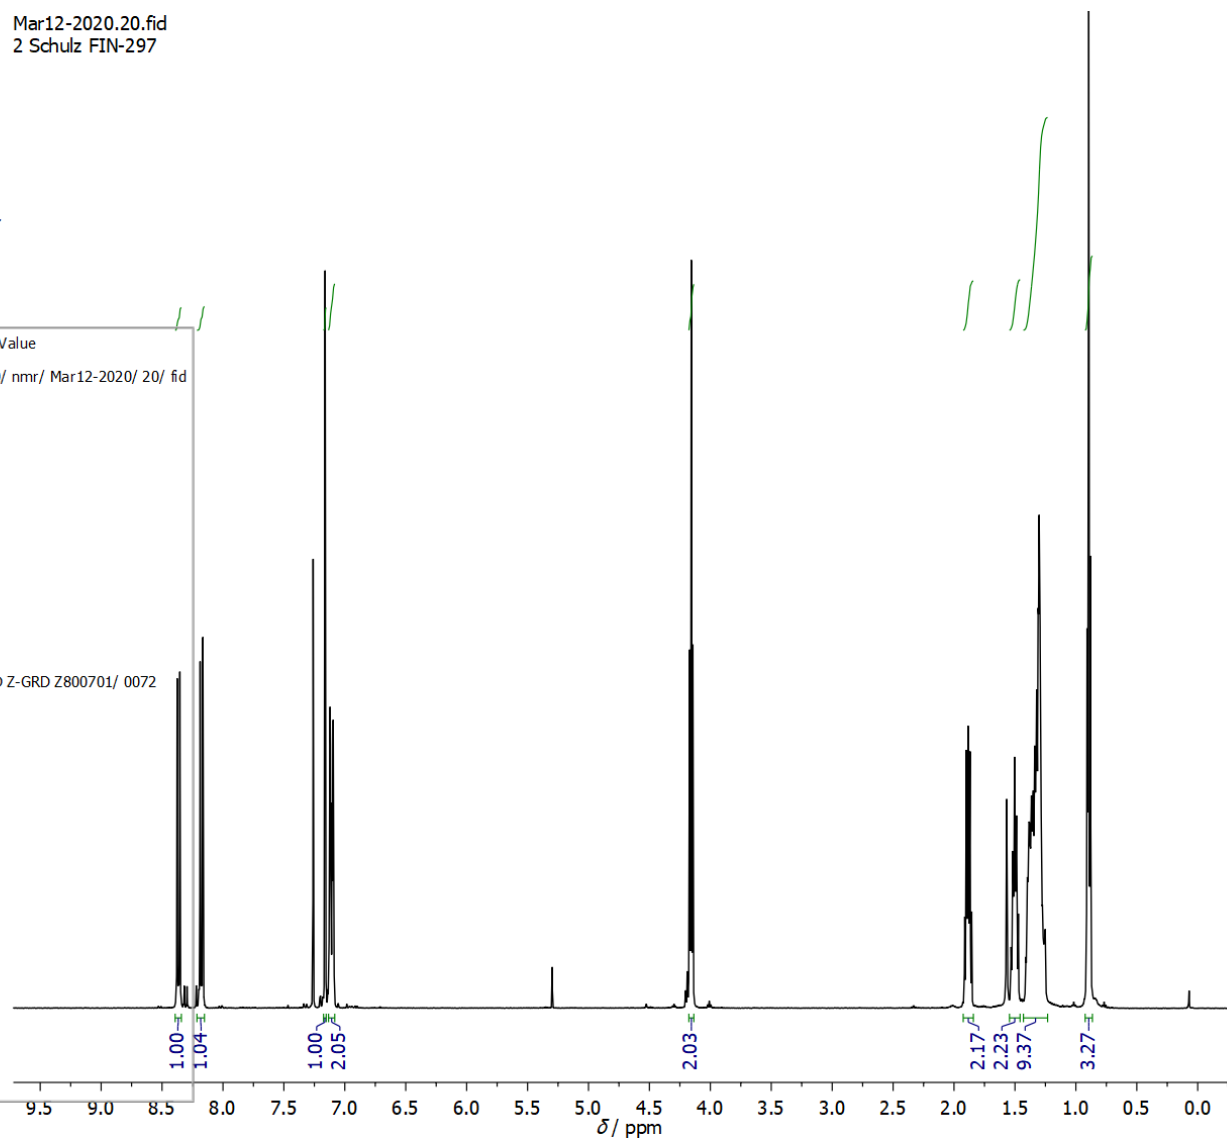

Figure S15:  $^1\text{H}$  NMR spectrum of compound **80-AzCN-Br**

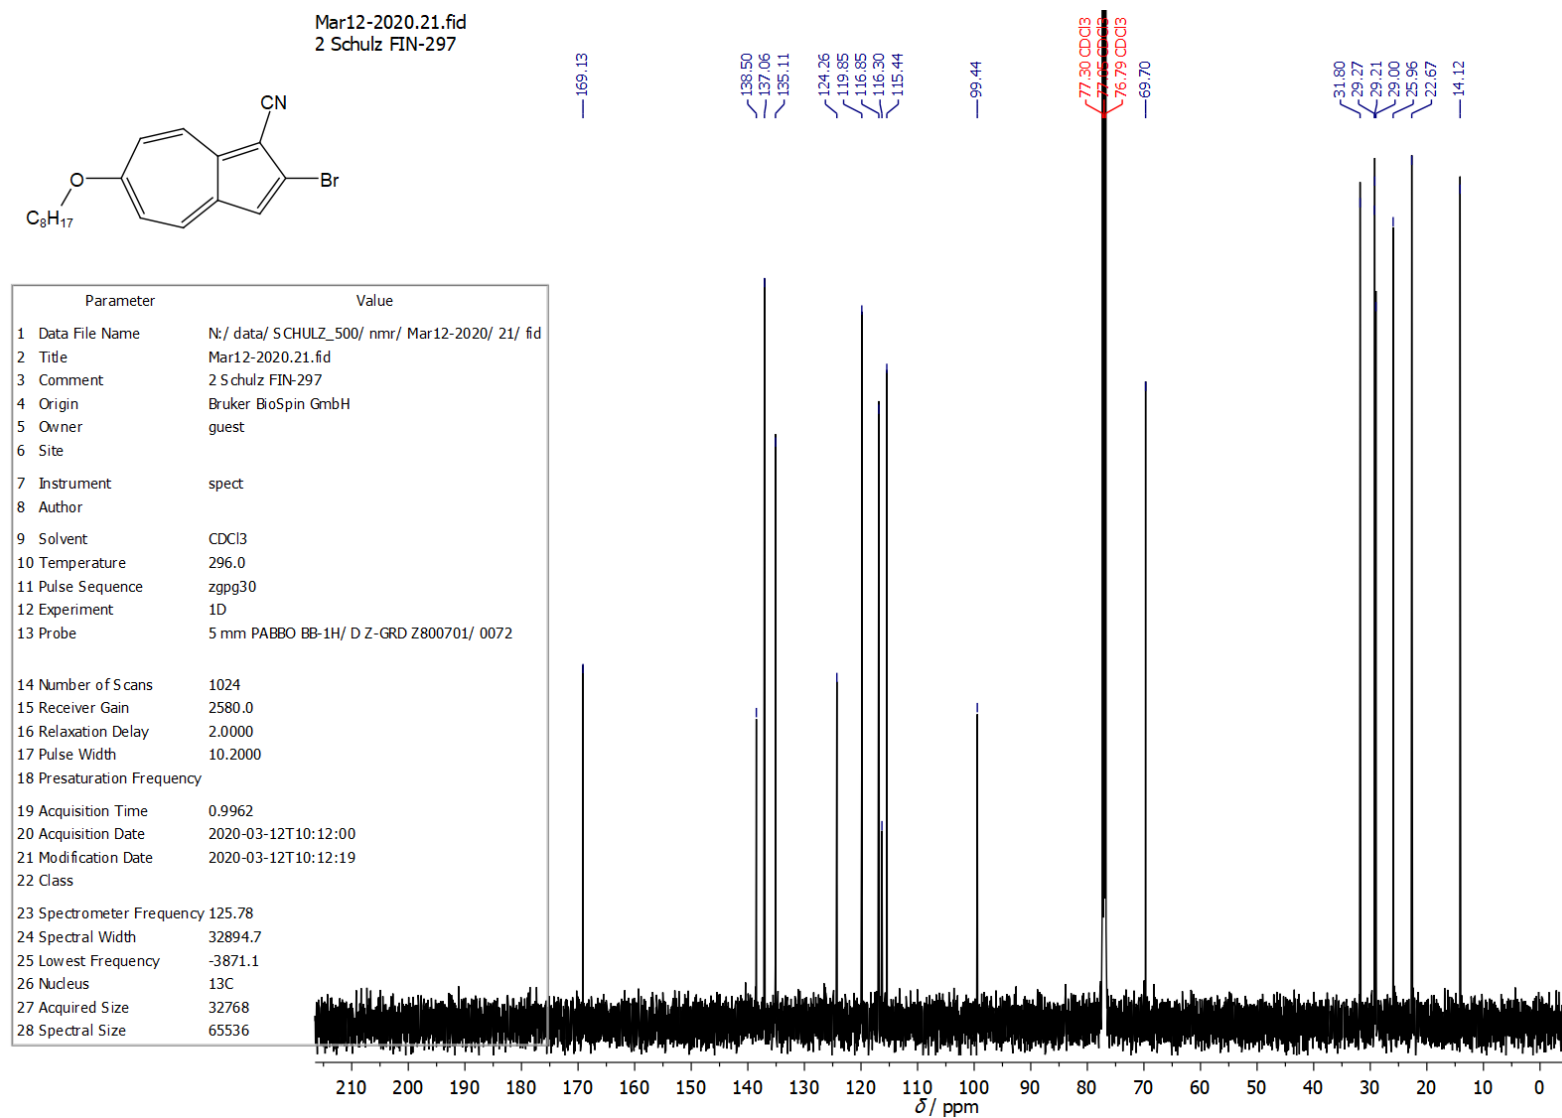

Figure S16:  $^{13}\text{C}$  NMR spectrum of compound **8O-AzCN-Br**

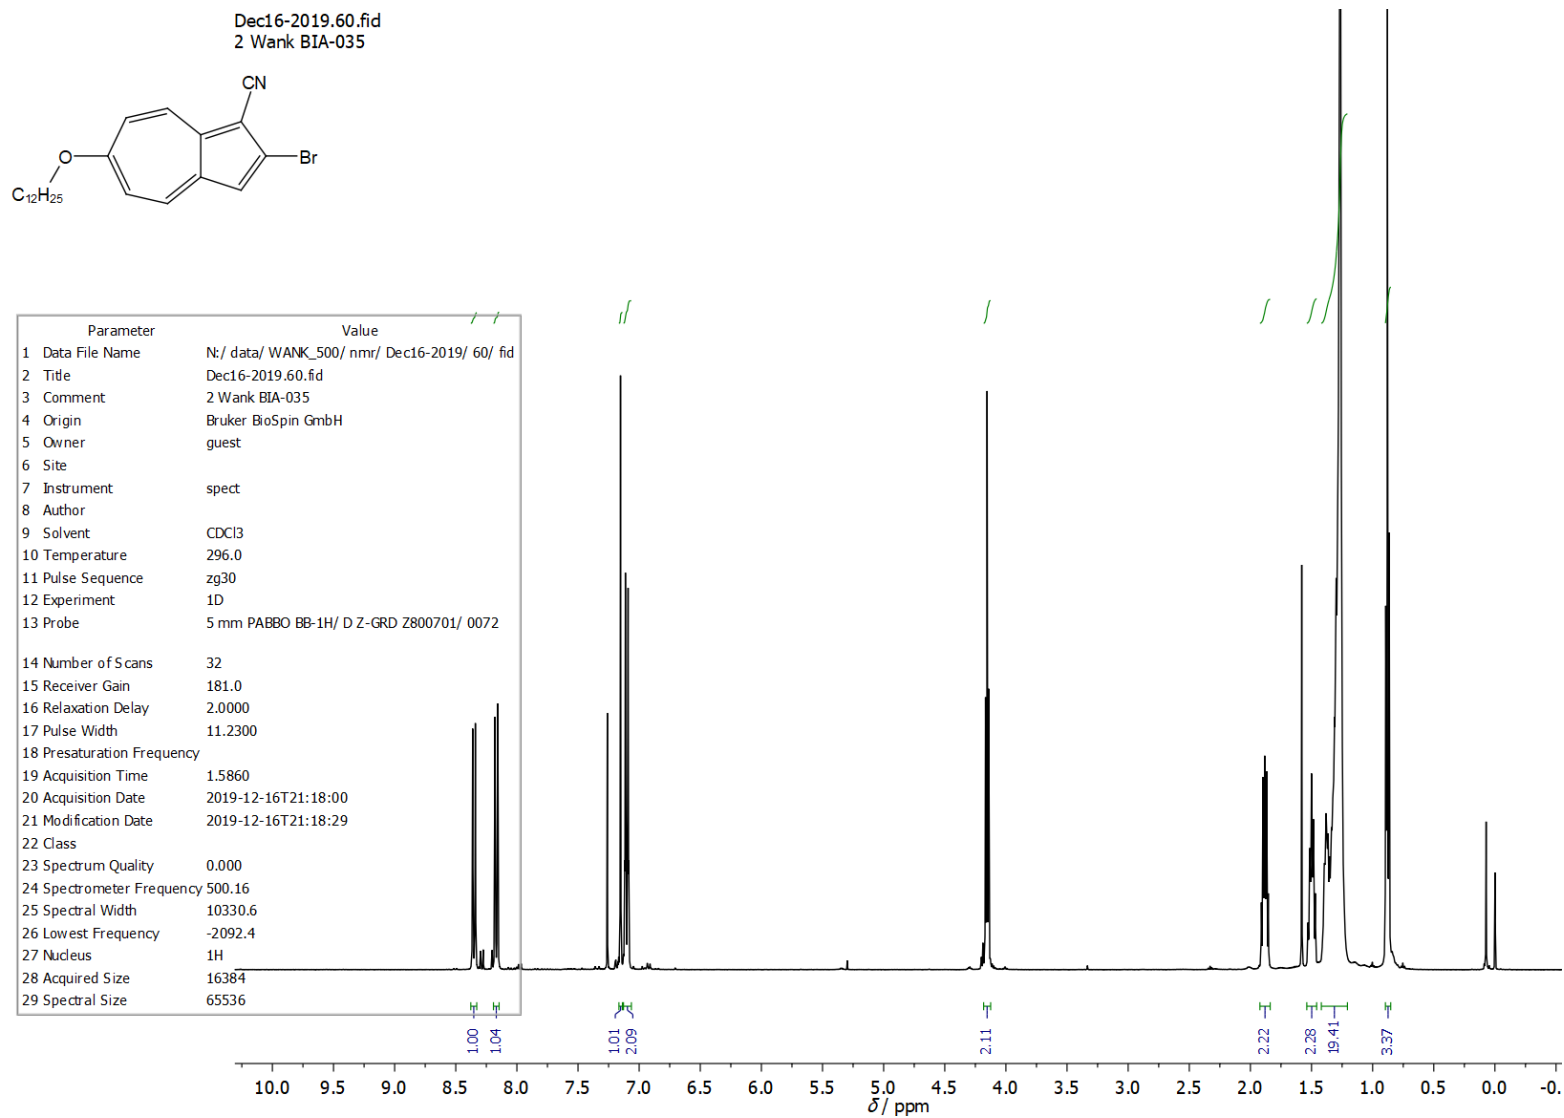

Figure S17:  $^1\text{H}$  NMR spectrum of compound **12O-AzCN-Br**

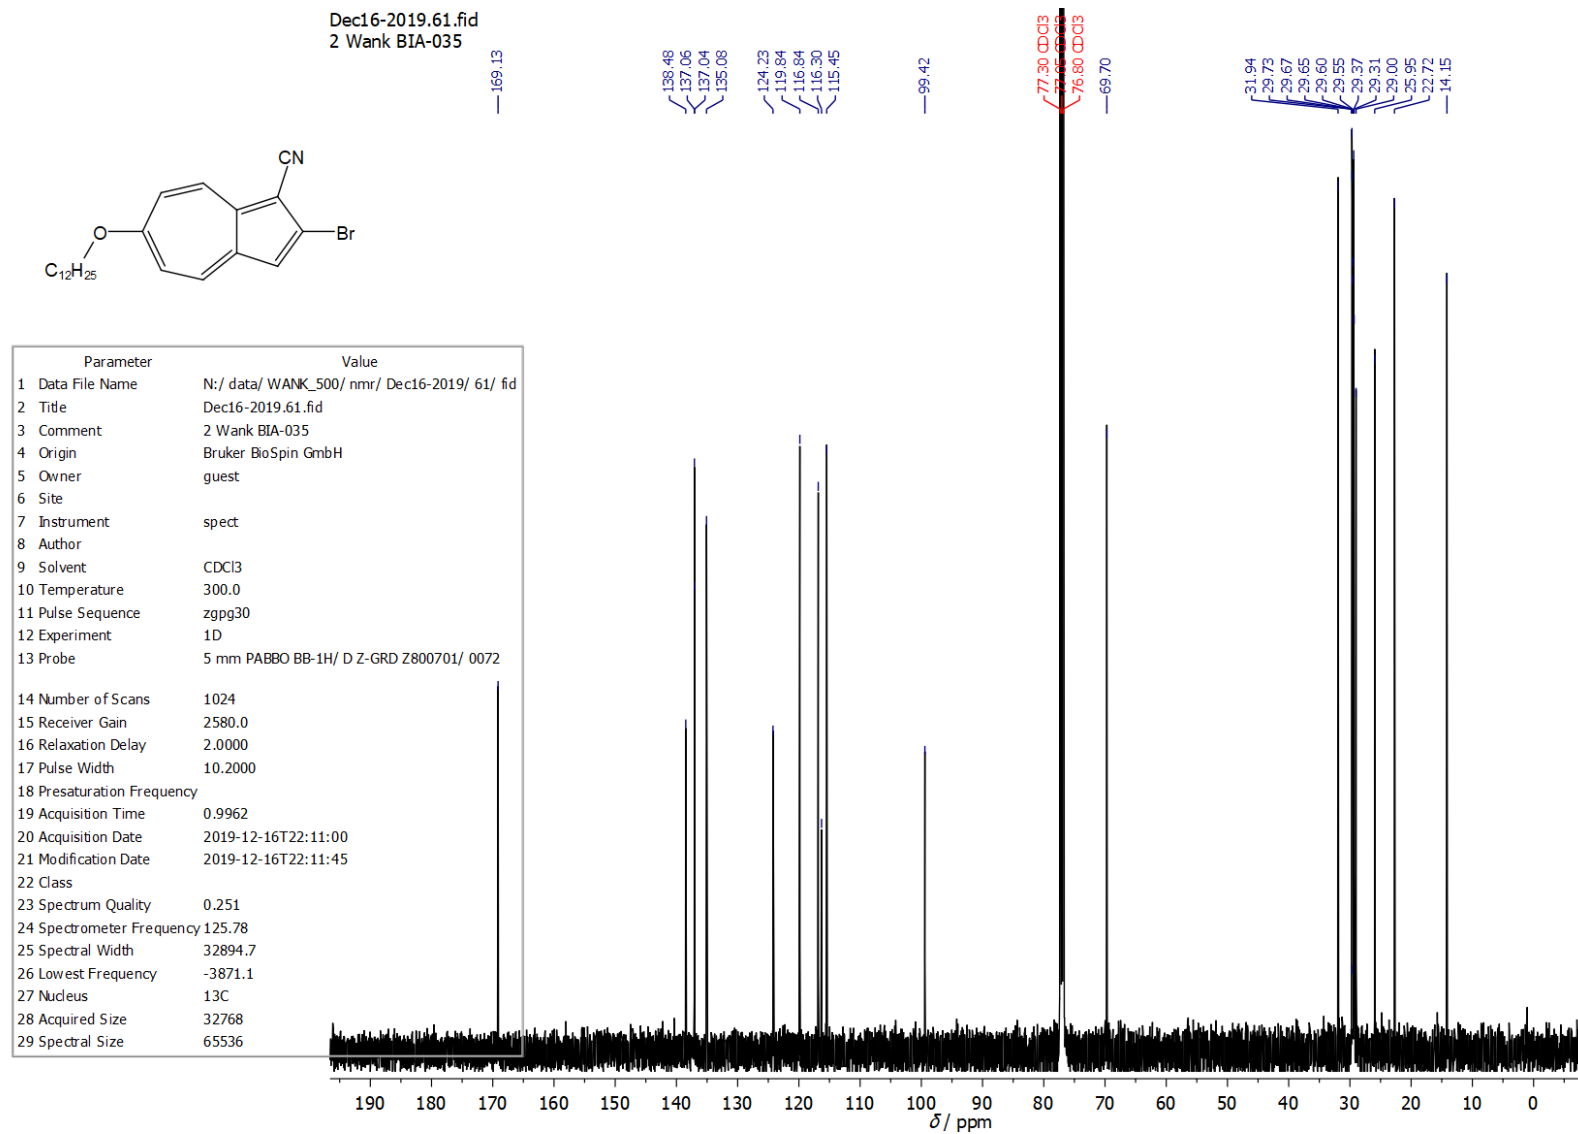

Figure S18:  $^{13}\text{C}$ NMR spectrum of compound **12O-AzCN-Br**

Mar19-2020.30.fid  
02 Schulz FIN-300-2

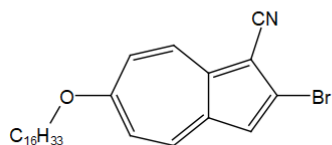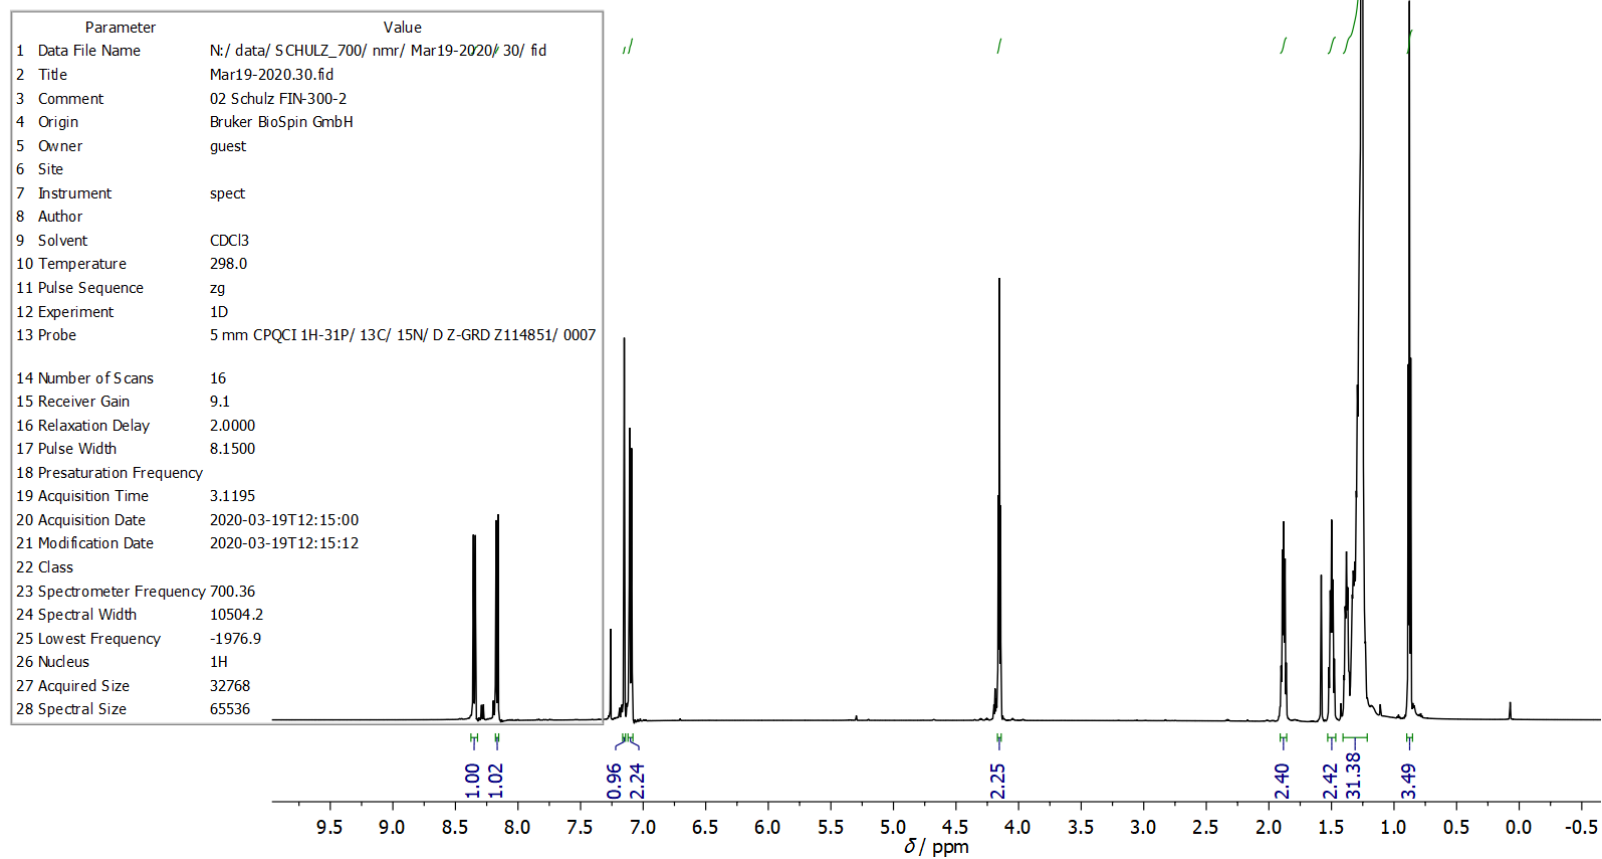

Figure S19:  $^1\text{H}$  NMR spectrum of compound **16O-AzCN-Br**

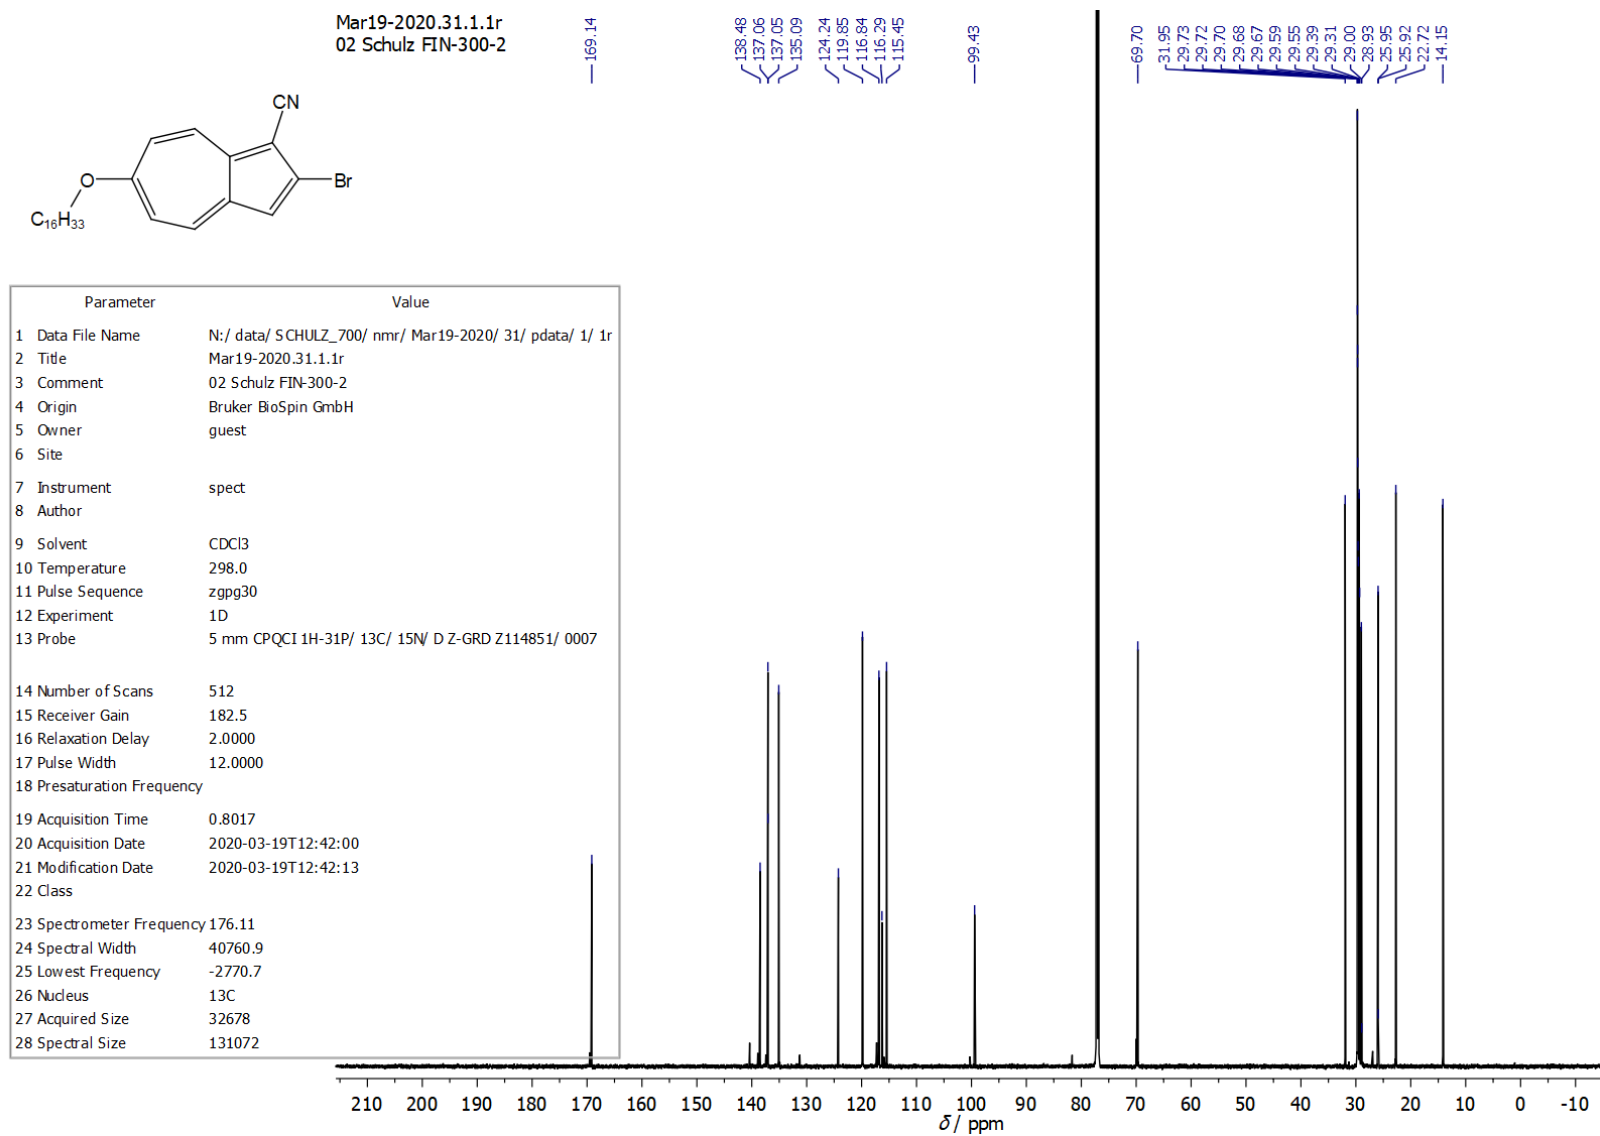

Jul21-2020.30.fid  
02 Schulz FIN-299

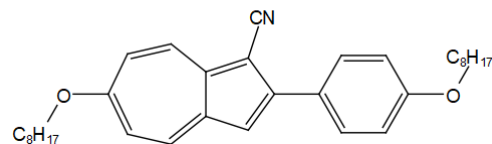

| Parameter                  | Value                                              |
|----------------------------|----------------------------------------------------|
| 1 Data File Name           | N:/ data/ SCHULZ_700/ nmr/ Jul21-2020/ 30/ fid     |
| 2 Title                    | Jul21-2020.30.fid                                  |
| 3 Comment                  | 02 Schulz FIN-299                                  |
| 4 Origin                   | Bruker BioSpin GmbH                                |
| 5 Owner                    | guest                                              |
| 6 Site                     |                                                    |
| 7 Instrument               | spect                                              |
| 8 Author                   |                                                    |
| 9 Solvent                  | CDCl3                                              |
| 10 Temperature             | 298.0                                              |
| 11 Pulse Sequence          | zg                                                 |
| 12 Experiment              | 1D                                                 |
| 13 Probe                   | 5 mm CPQCI 1H-31P/ 13C/ 15N/ D Z-GRD Z114851/ 0007 |
| 14 Number of Scans         | 16                                                 |
| 15 Receiver Gain           | 7.9                                                |
| 16 Relaxation Delay        | 2.0000                                             |
| 17 Pulse Width             | 8.1500                                             |
| 18 Presaturation Frequency |                                                    |
| 19 Acquisition Time        | 3.1195                                             |
| 20 Acquisition Date        | 2020-07-21T12:04:00                                |
| 21 Modification Date       | 2020-07-21T12:04:17                                |
| 22 Class                   |                                                    |
| 23 Spectrum Quality        | 0.000                                              |
| 24 Spectrometer Frequency  | 700.36                                             |
| 25 Spectral Width          | 10504.2                                            |
| 26 Lowest Frequency        | -1977.2                                            |
| 27 Nucleus                 | 1H                                                 |
| 28 Acquired Size           | 32768                                              |
| 29 Spectral Size           | 65536                                              |

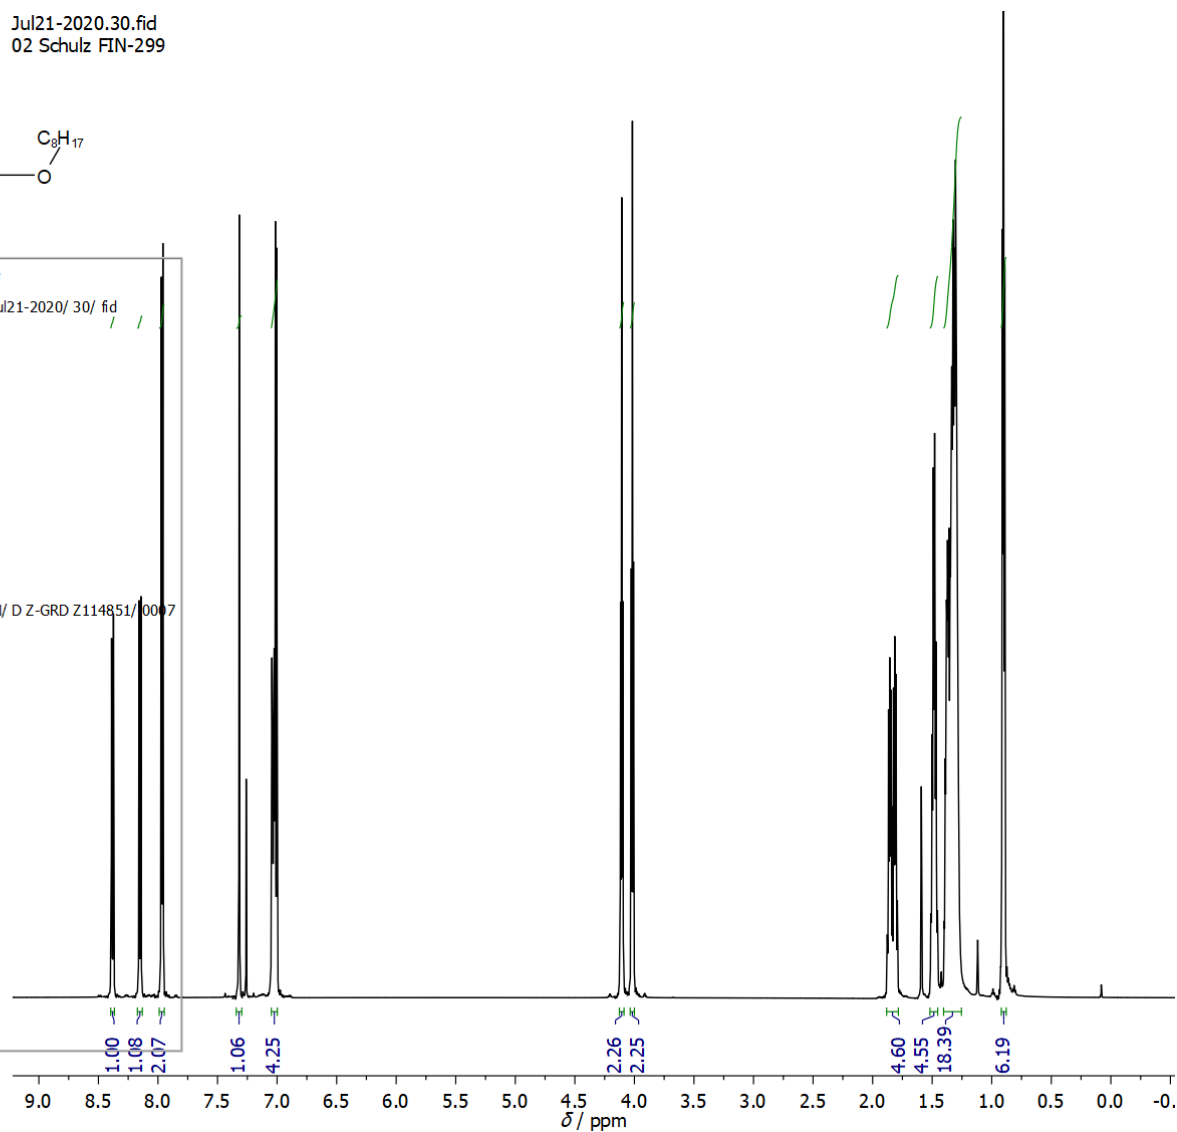

Figure S21:  $^1\text{H}$  NMR spectrum of compound **80-AzCN-PhO8**

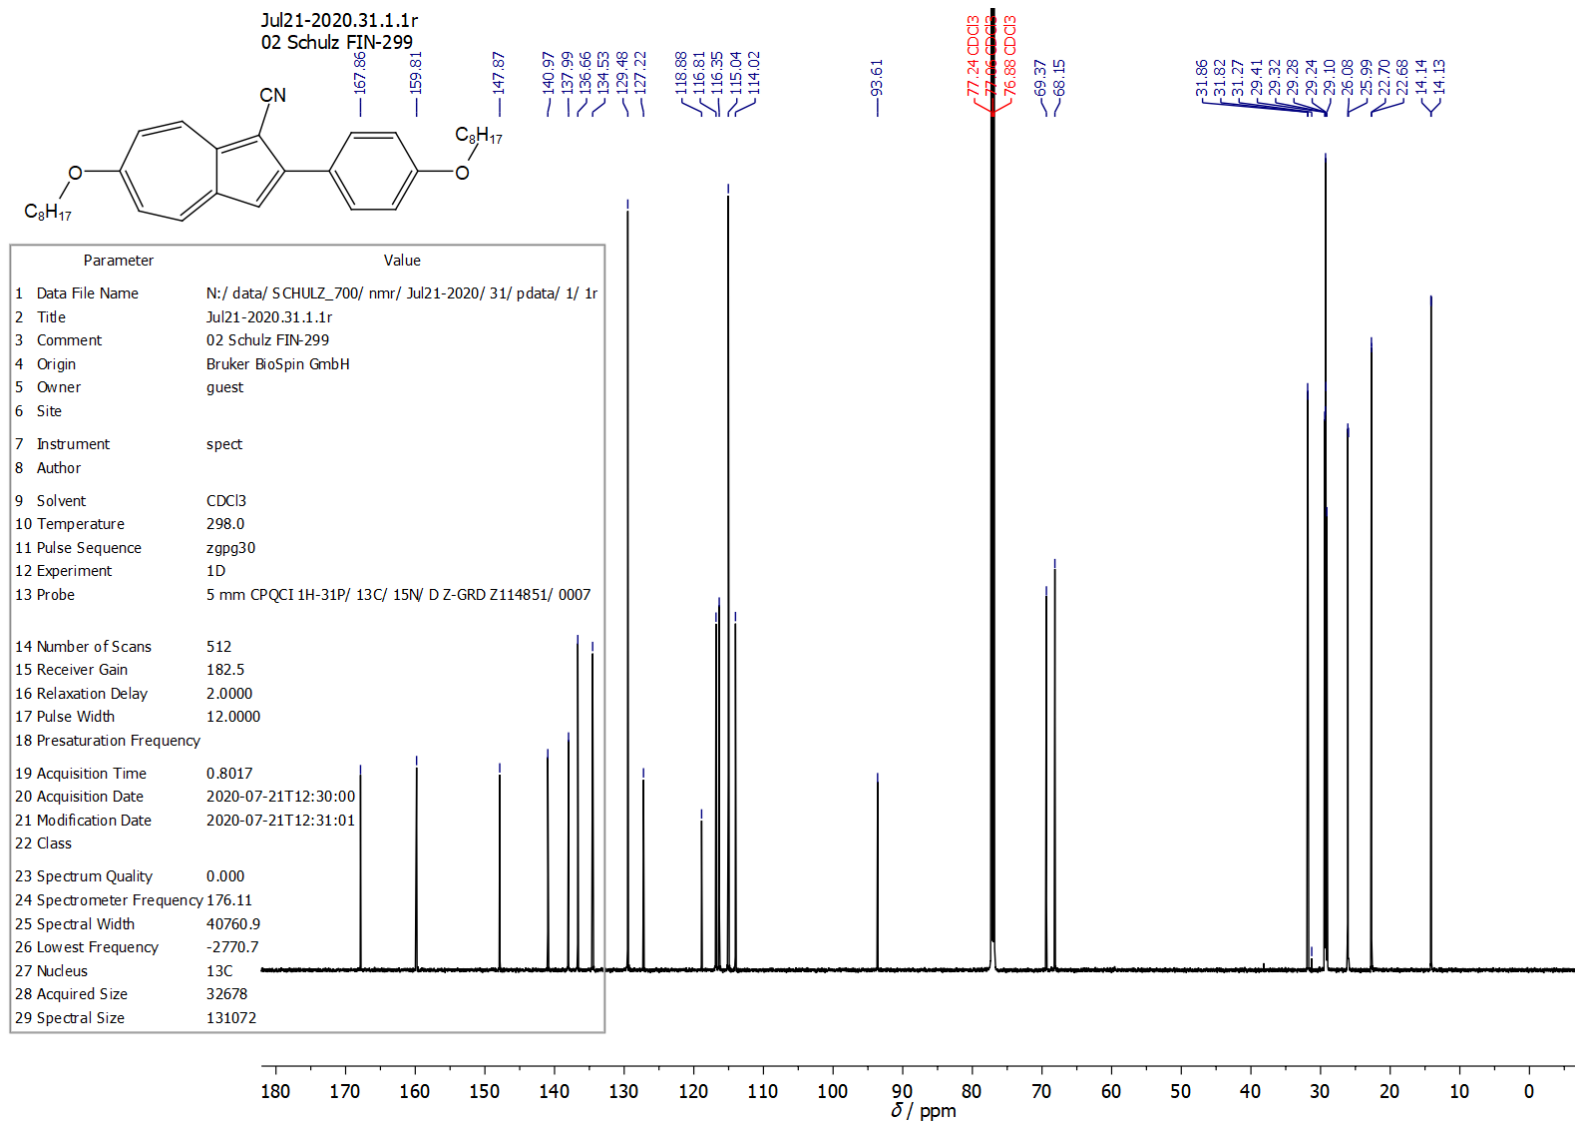

Figure S22:  $^{13}\text{C}$  NMR spectrum of compound **80-AzCN-PhO8**

Jul21-2020.50.fid  
02 Schulz FIN-BIA-039

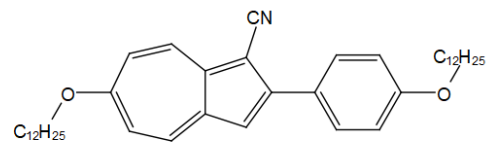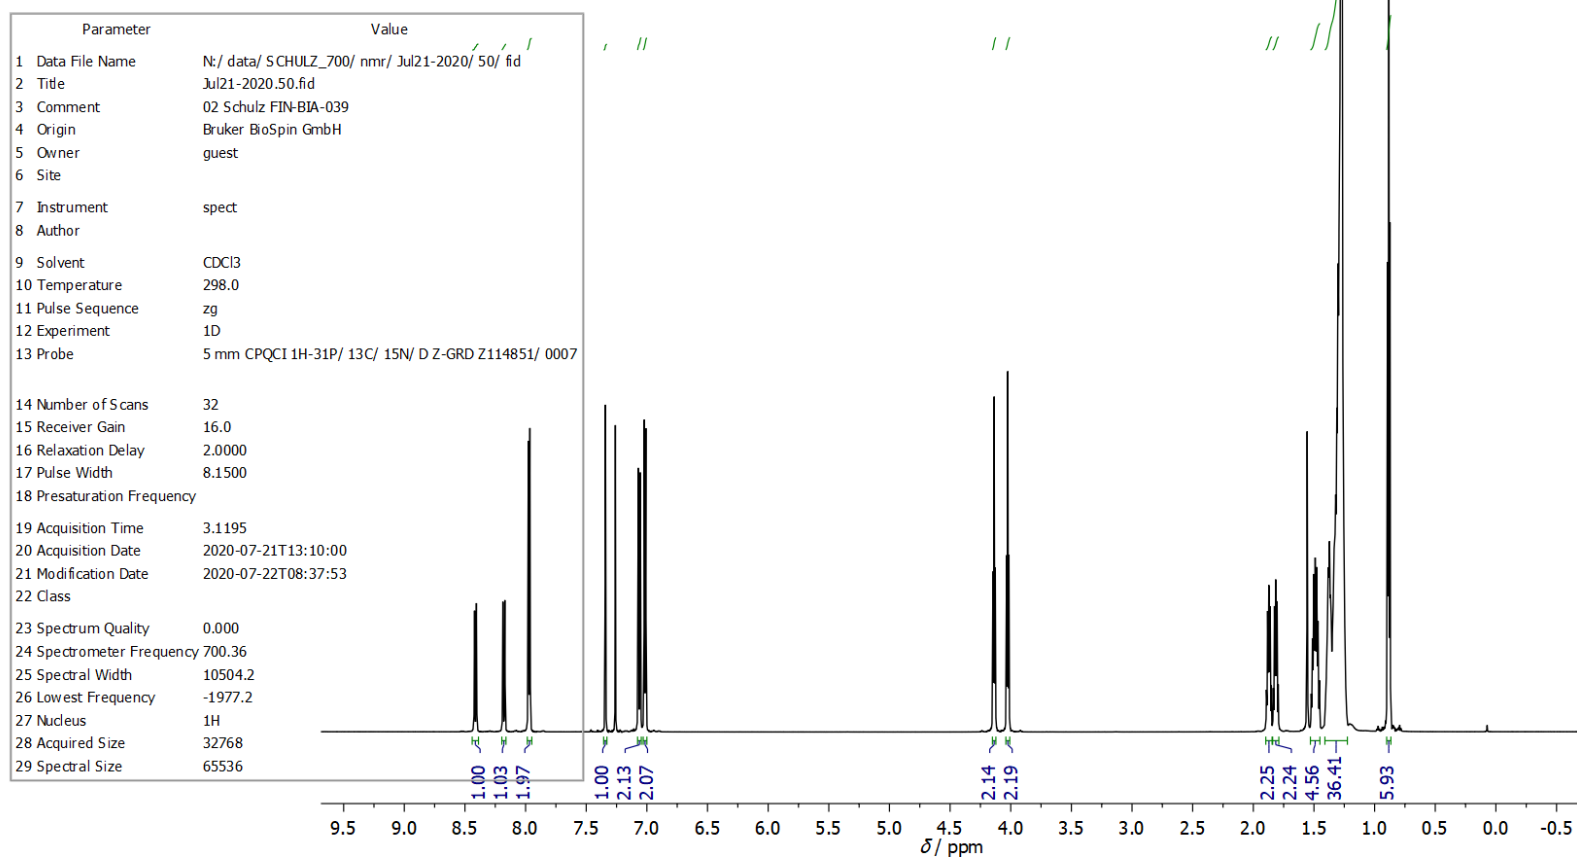

Figure S23:  $^1\text{H}$  NMR spectrum of compound **120-AzCN-PhO12**

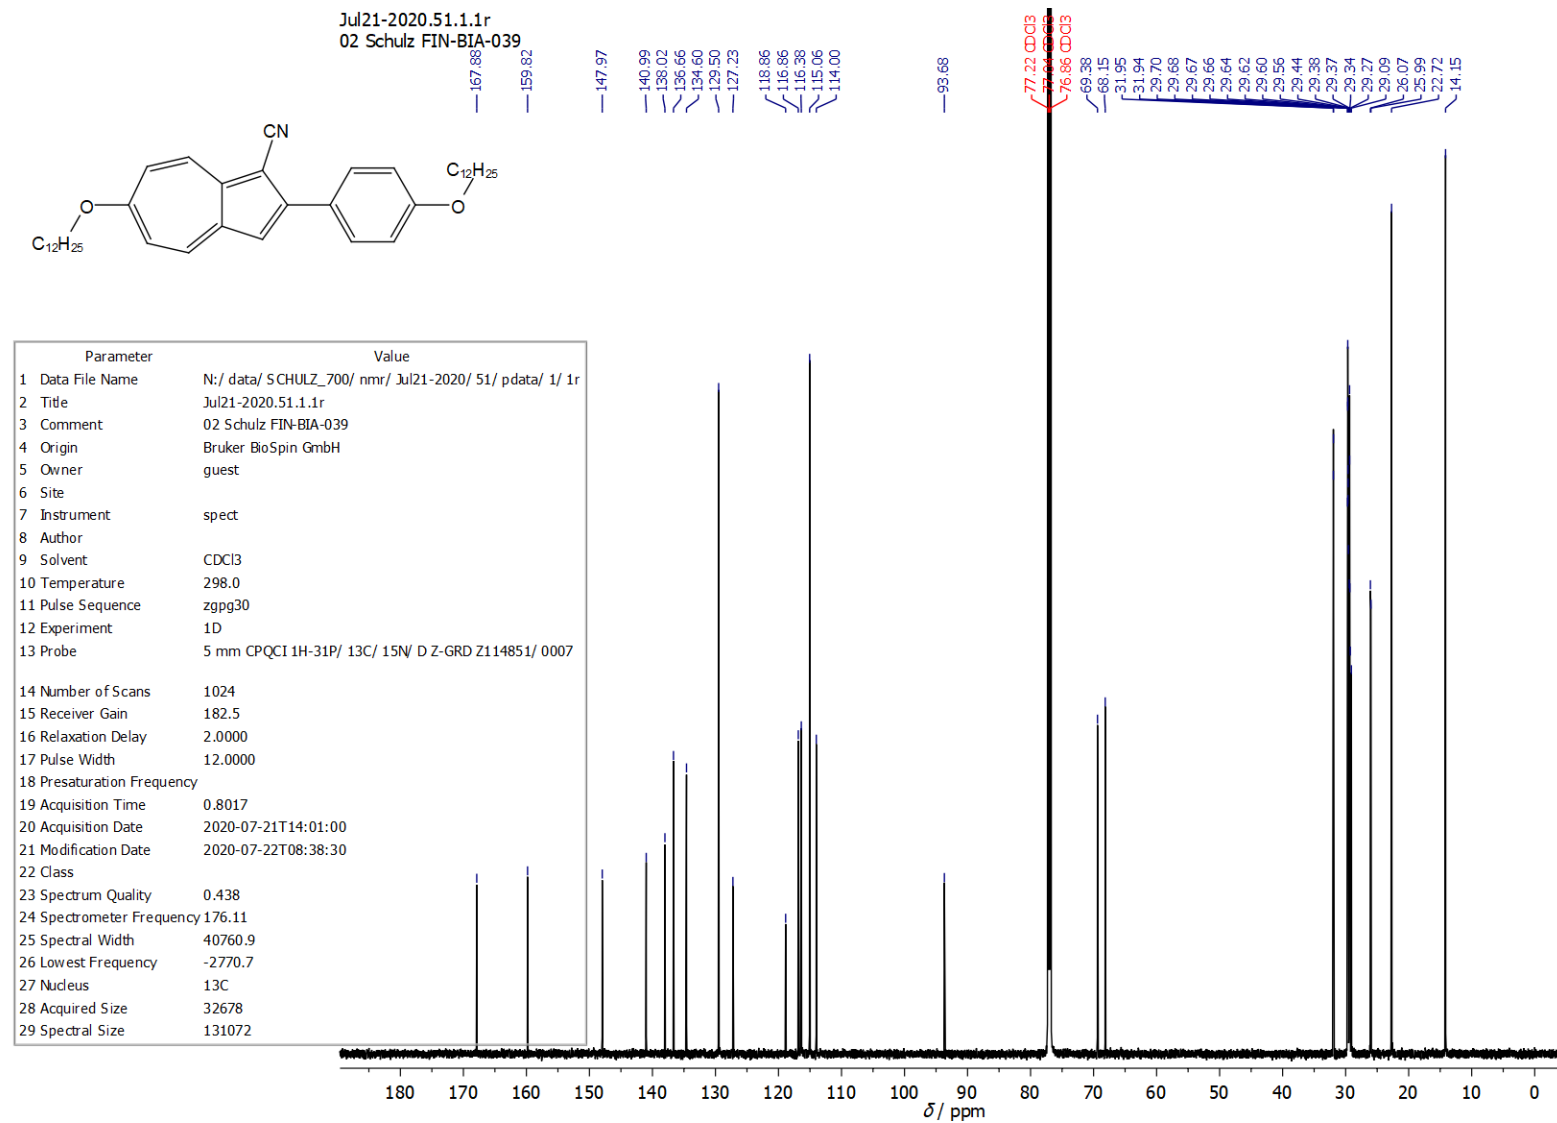

Figure S24:  $^{13}\text{C}$  NMR spectrum of compound 12O-AzCN-PhO12

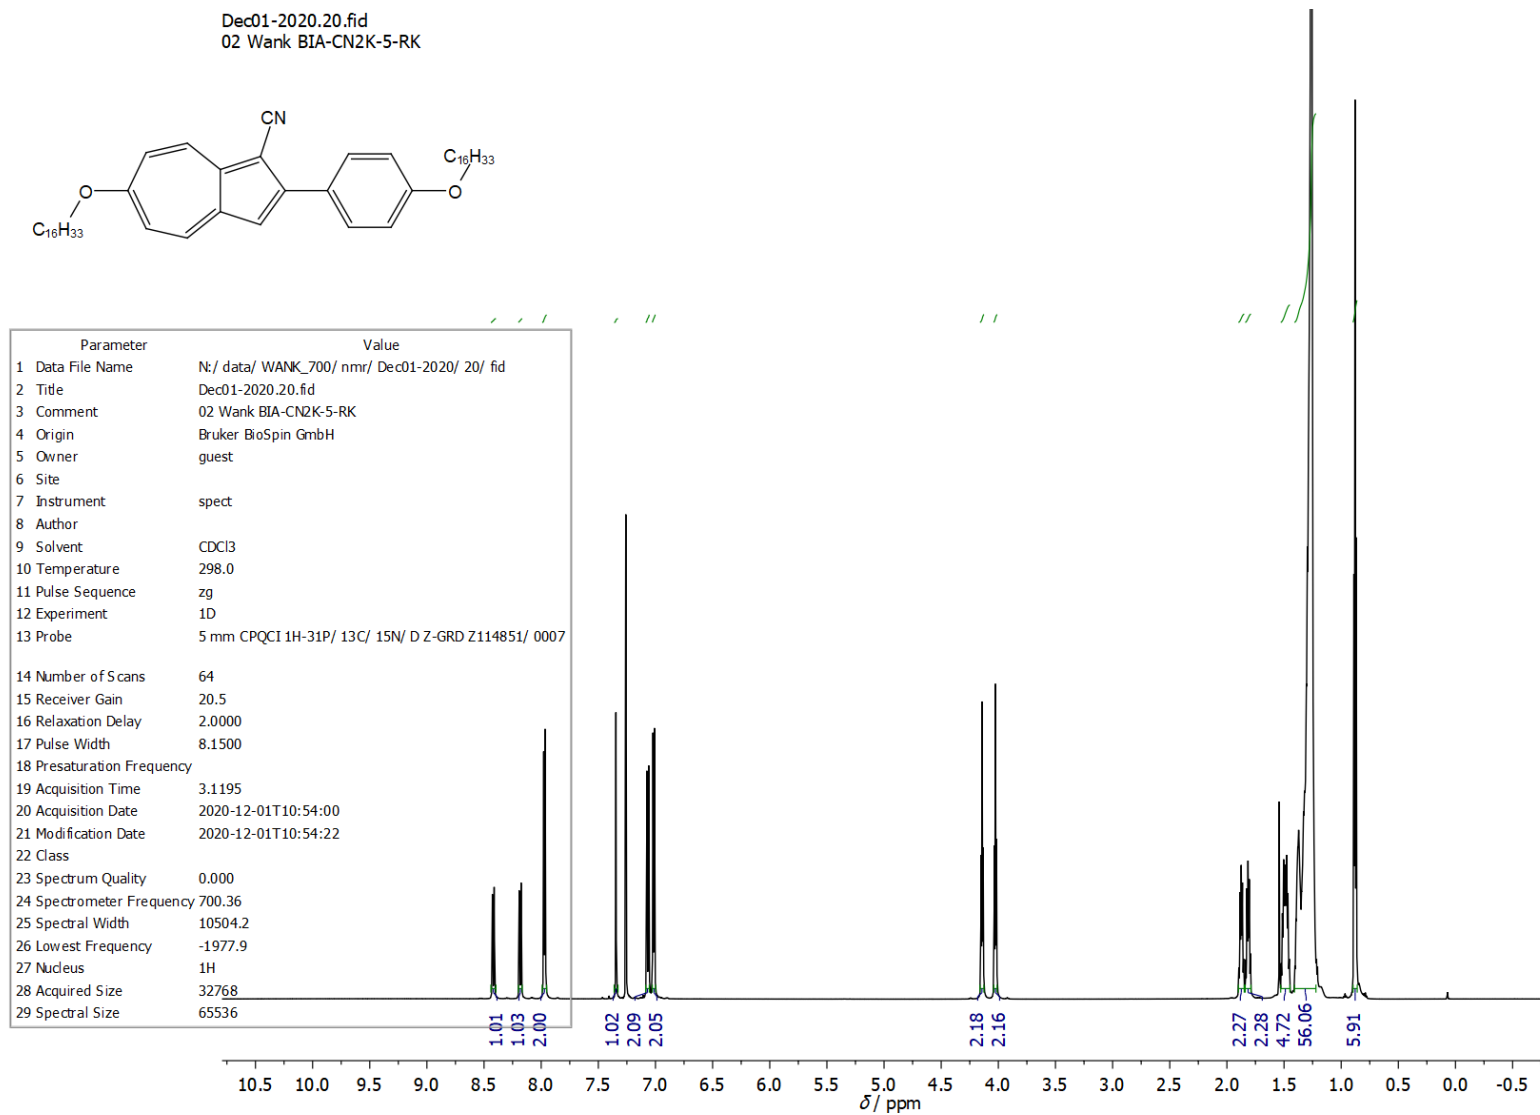

Figure S25:  $^1\text{H}$  NMR spectrum of compound **16O-AzCN-PhO16**

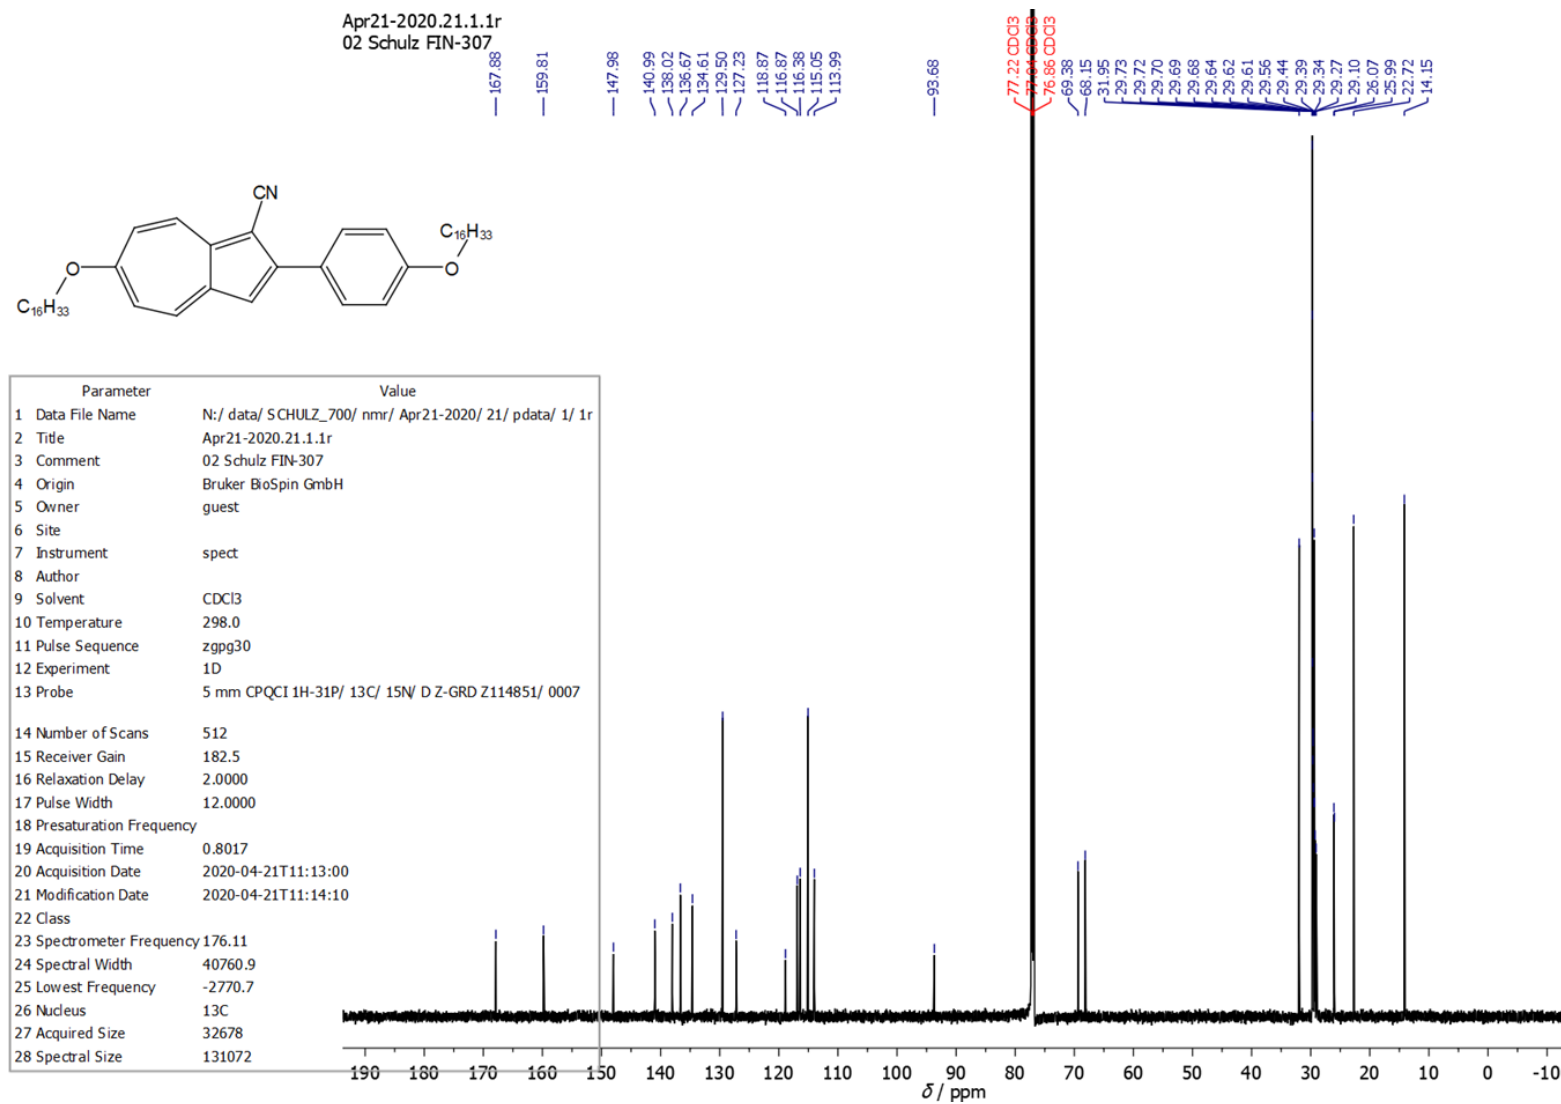

Figure S26: <sup>13</sup>C NMR spectrum of compound 16O-AzCN-PhO16

Jul21-2020.40.fid  
02 Schulz FIN-331

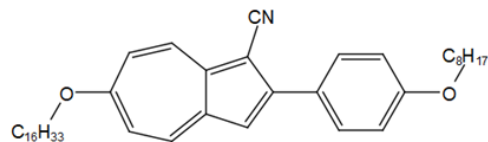

| Parameter                  | Value                                              |
|----------------------------|----------------------------------------------------|
| 1 Data File Name           | N:/ data/ SCHULZ_700/ nmr/ Jul21-2020/ 40/ fid     |
| 2 Title                    | Jul21-2020.40.fid                                  |
| 3 Comment                  | 02 Schulz FIN-331                                  |
| 4 Origin                   | Bruker BioSpin GmbH                                |
| 5 Owner                    | guest                                              |
| 6 Site                     |                                                    |
| 7 Instrument               | spect                                              |
| 8 Author                   |                                                    |
| 9 Solvent                  | CDCl3                                              |
| 10 Temperature             | 298.0                                              |
| 11 Pulse Sequence          | zg                                                 |
| 12 Experiment              | 1D                                                 |
| 13 Probe                   | 5 mm CPQCI 1H-31P/ 13C/ 15N/ D Z-GRD Z114851/ 0007 |
| 14 Number of Scans         | 16                                                 |
| 15 Receiver Gain           | 9.9                                                |
| 16 Relaxation Delay        | 2.0000                                             |
| 17 Pulse Width             | 8.1500                                             |
| 18 Presaturation Frequency |                                                    |
| 19 Acquisition Time        | 3.1195                                             |
| 20 Acquisition Date        | 2020-07-21T12:36:00                                |
| 21 Modification Date       | 2020-07-21T12:36:53                                |
| 22 Class                   |                                                    |
| 23 Spectrometer Frequency  | 700.36                                             |
| 24 Spectral Width          | 10504.2                                            |
| 25 Lowest Frequency        | -1976.5                                            |
| 26 Nucleus                 | 1H                                                 |
| 27 Acquired Size           | 32768                                              |
| 28 Spectral Size           | 65536                                              |

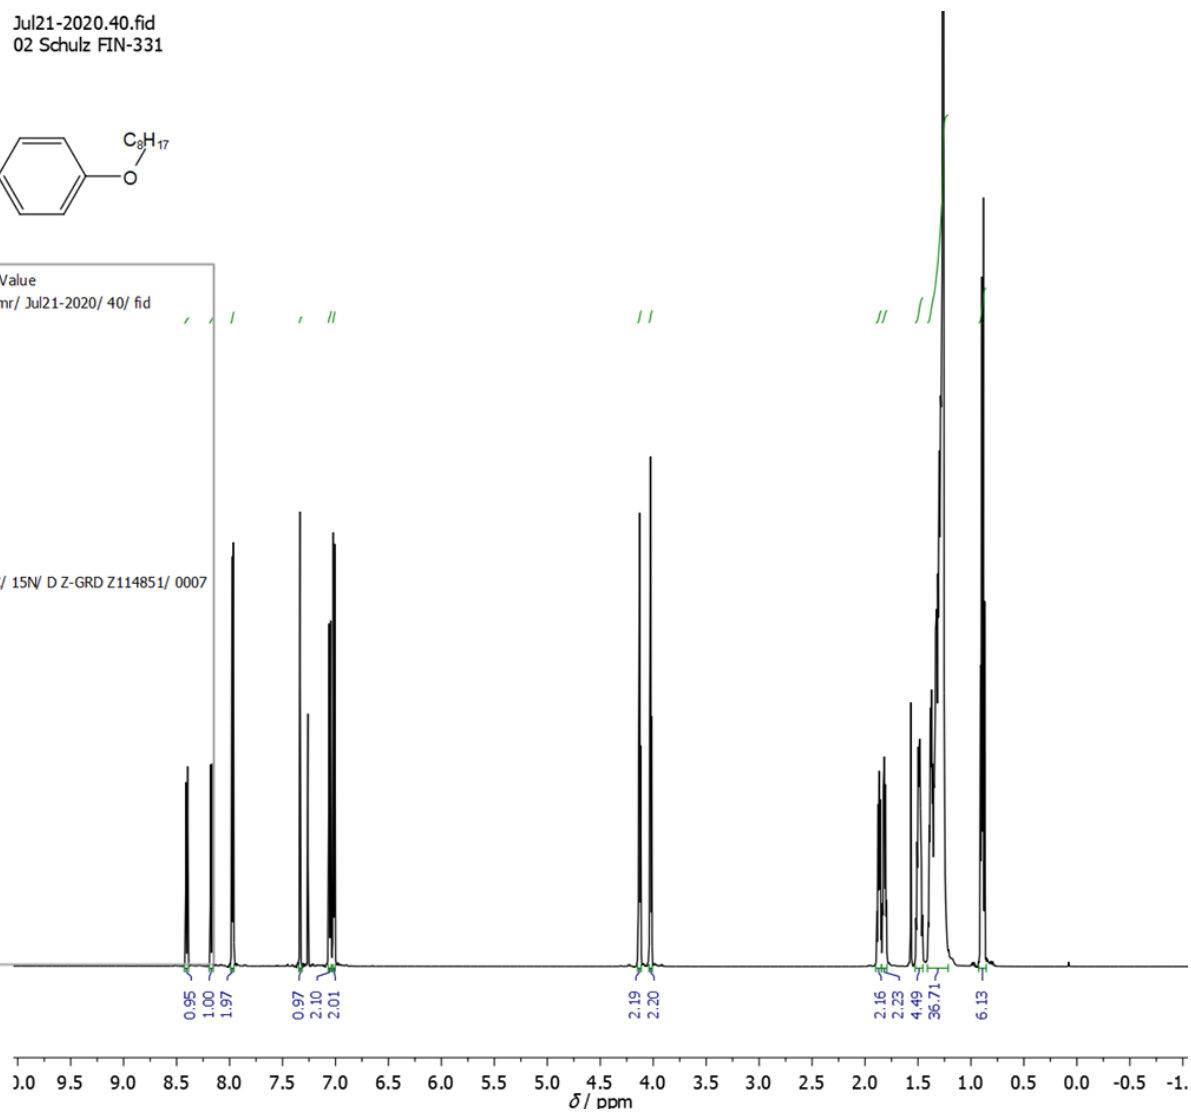

Figure S27:  $^1\text{H}$  NMR spectrum of compound **16O-AzCN-PhO8**

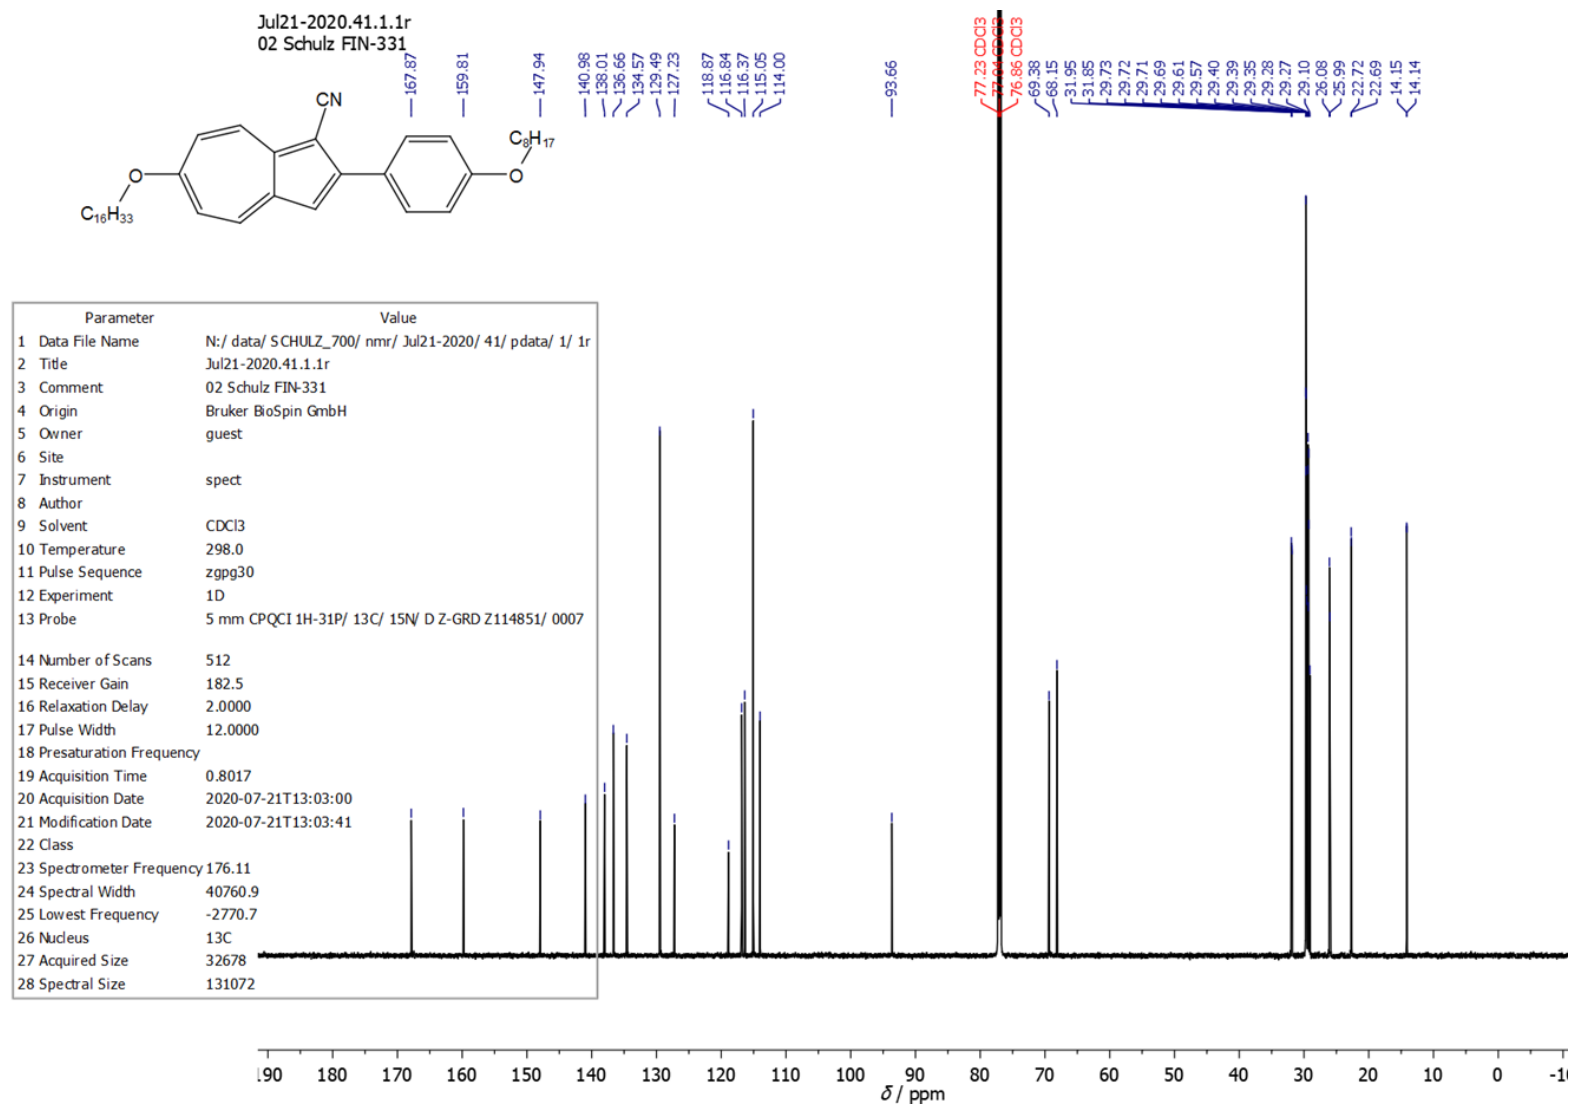

Figure S28:  $^{13}\text{C}$  NMR spectrum of compound **16O-AzCN-PhO8**

Aug27-2020.30.fid  
2 Schulz FIN-352

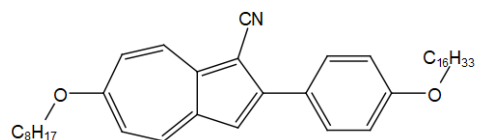

| Parameter                  | Value                                          |
|----------------------------|------------------------------------------------|
| 1 Data File Name           | N:/ data/ SCHULZ_500/ nmr/ Aug27-2020/ 30/ fid |
| 2 Title                    | Aug27-2020.30.fid                              |
| 3 Comment                  | 2 Schulz FIN-352                               |
| 4 Origin                   | Bruker BioSpin GmbH                            |
| 5 Owner                    | guest                                          |
| 6 Site                     |                                                |
| 7 Instrument               | spect                                          |
| 8 Author                   |                                                |
| 9 Solvent                  | CDCl3                                          |
| 10 Temperature             | 296.0                                          |
| 11 Pulse Sequence          | zg30                                           |
| 12 Experiment              | 1D                                             |
| 13 Probe                   | 5 mm PABBO BB-1H/ D Z-GRD Z800701/ 0072        |
| 14 Number of Scans         | 32                                             |
| 15 Receiver Gain           | 181.0                                          |
| 16 Relaxation Delay        | 2.0000                                         |
| 17 Pulse Width             | 11.2300                                        |
| 18 Presaturation Frequency |                                                |
| 19 Acquisition Time        | 1.5860                                         |
| 20 Acquisition Date        | 2020-08-27T12:54:00                            |
| 21 Modification Date       | 2020-08-27T12:54:22                            |
| 22 Class                   |                                                |
| 23 Spectrometer Frequency  | 500.16                                         |
| 24 Spectral Width          | 10330.6                                        |
| 25 Lowest Frequency        | -2092.6                                        |
| 26 Nucleus                 | 1H                                             |
| 27 Acquired Size           | 16384                                          |
| 28 Spectral Size           | 65536                                          |

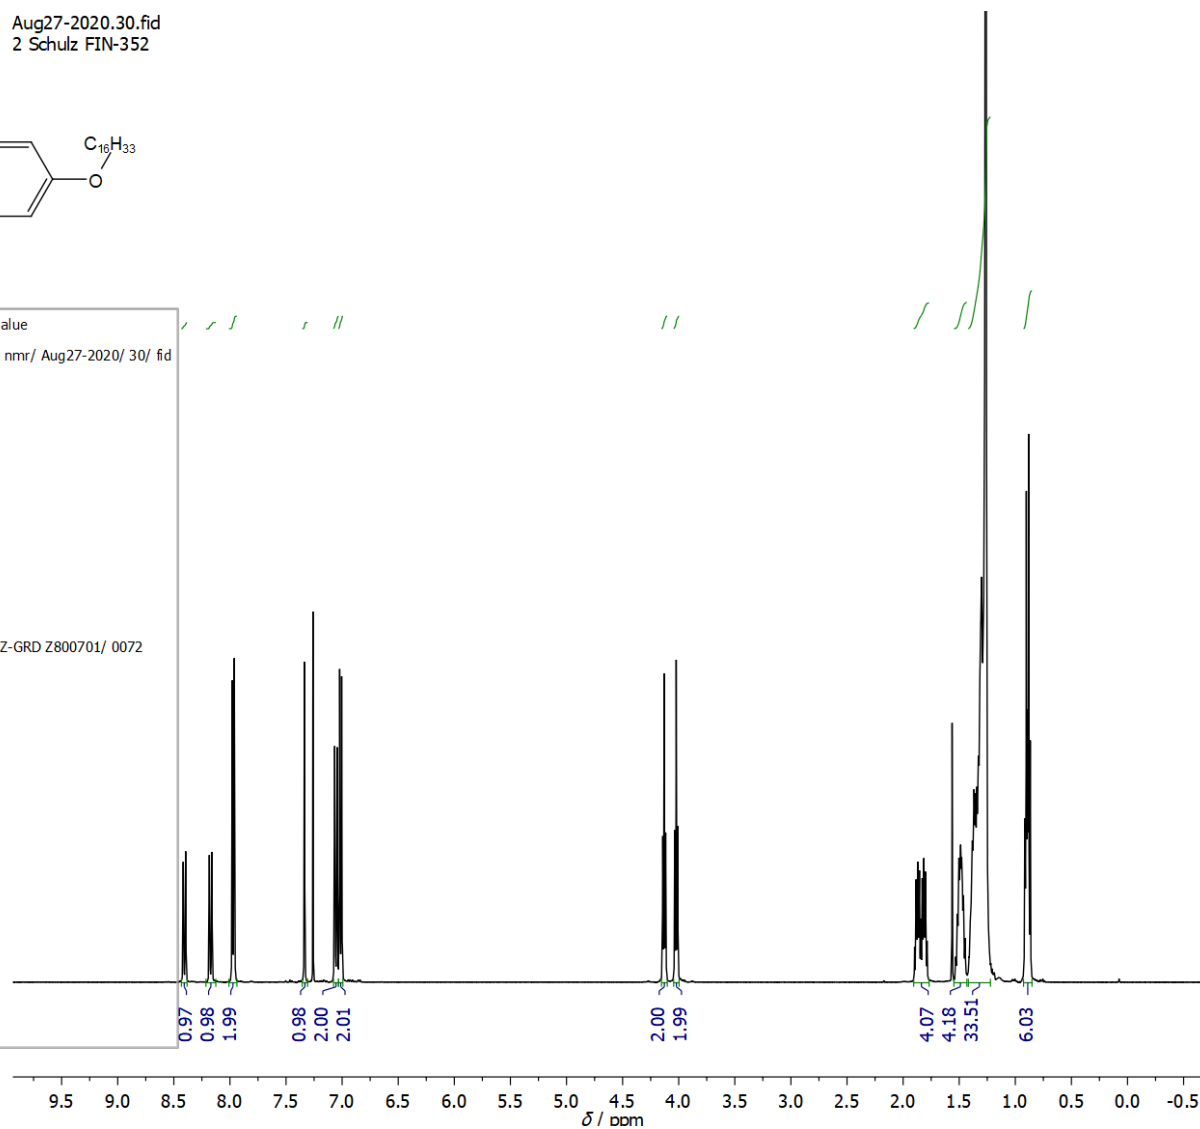

Figure S29:  $^1\text{H}$  NMR spectrum of compound **80-AzCN-PhO16**

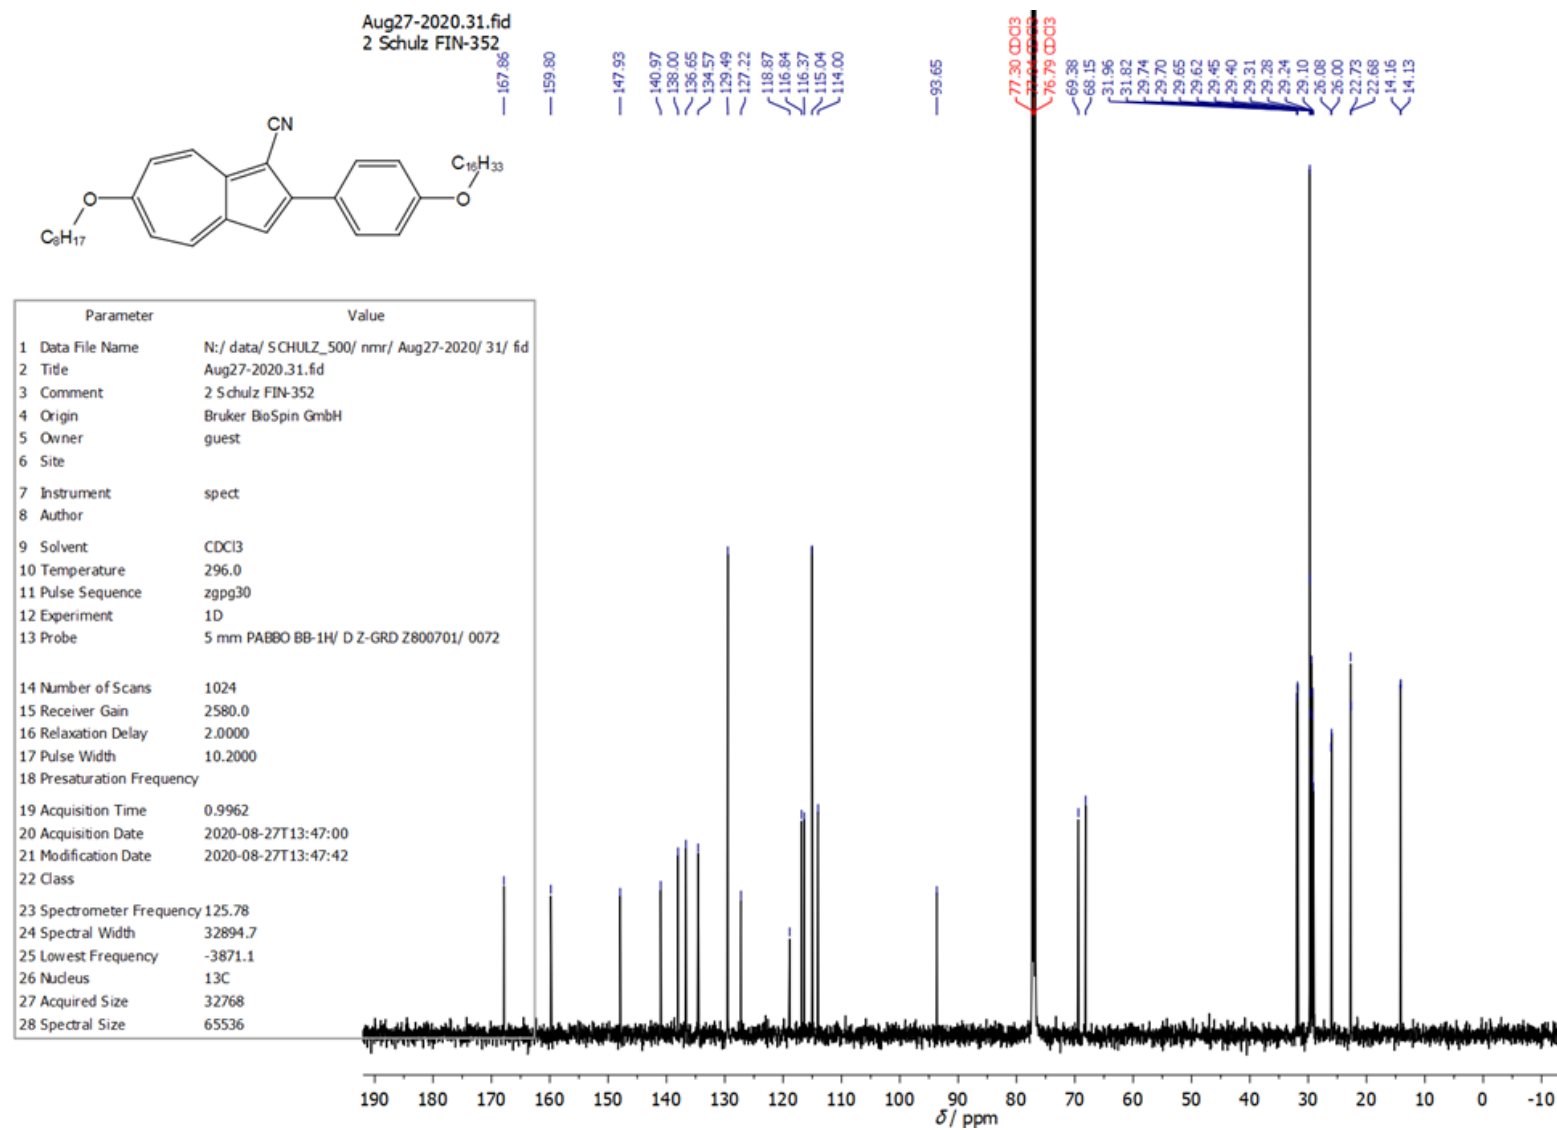

Figure S30:  $^{13}\text{C}$  NMR spectrum of compound 8O-AzCN-PhO16
